# Supplementary material for: Identification and comparative analysis of the microRNA transcriptome in roots of two contrasting tobacco genotypes in response to cadmium stress
Source: PubMed Central journal article supplement (PMC5036098; doi:10.1038/srep32805), 2016-09-26
Supplement: srep32805-s1.pdf [file srep32805-s1.pdf]

## Identification and comparative analysis of the microRNA transcriptome in roots of two contrasting tobacco genotypes in response to cadmium stress

Xiaoyan He, Weite Zheng, Fangbin Cao, Feibo Wu\*

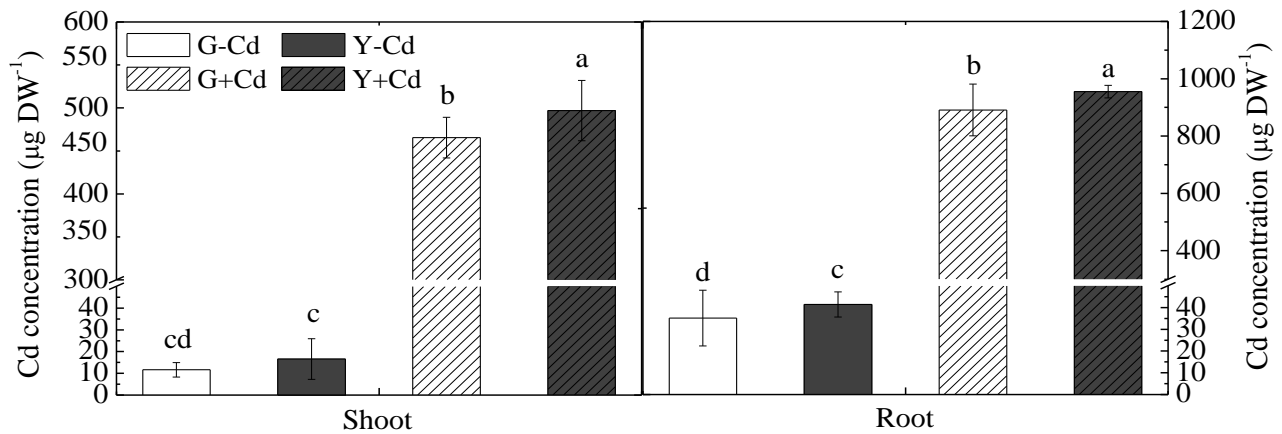

**Figure S1.** Cd concentrations in shoots and roots of Guiyan 1 (G) and Yunyan 2 (Y) under 50  $\mu\text{M}$  Cd stress for 5 days. Error bars represent SD values ( $n=3$ ). Different letters indicate significant differences ( $P<0.05$ ) among each treatment of the two genotypes. G-Cd, G+Cd, Y-Cd and Y+Cd correspond to hydroponically grown tobacco of the cultivars Guiyan 1 and Yunyan 2 grown in basic nutrition solution (BNS) or BNS + 50  $\mu\text{M}$  Cd.

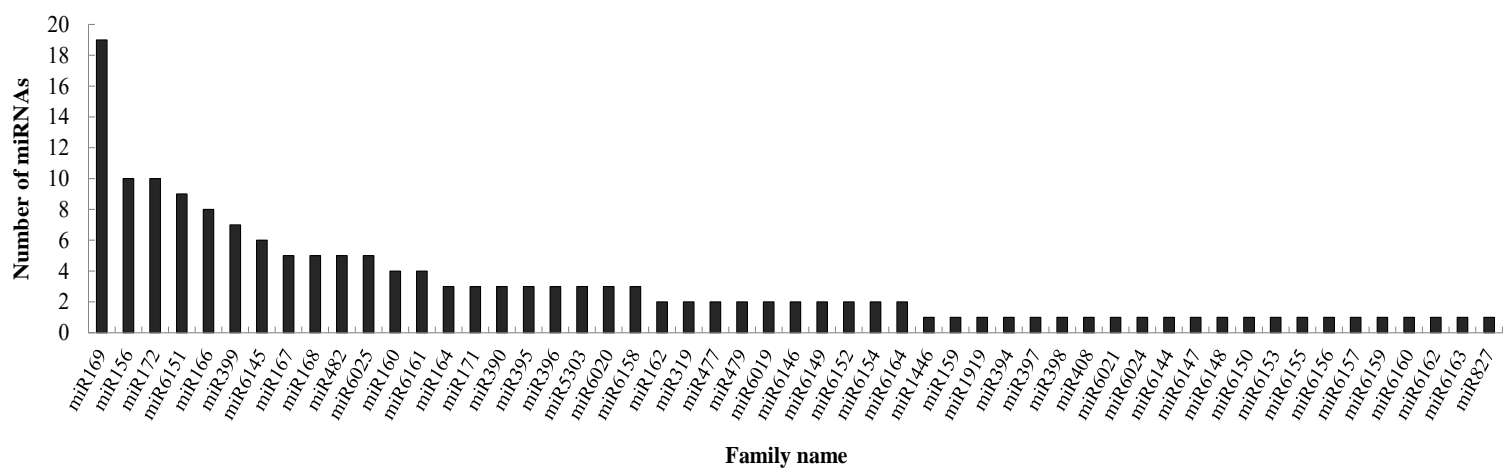

**Figure S2.** Family size (number of miRNAs in each family) of the known miRNAs in tobacco roots.

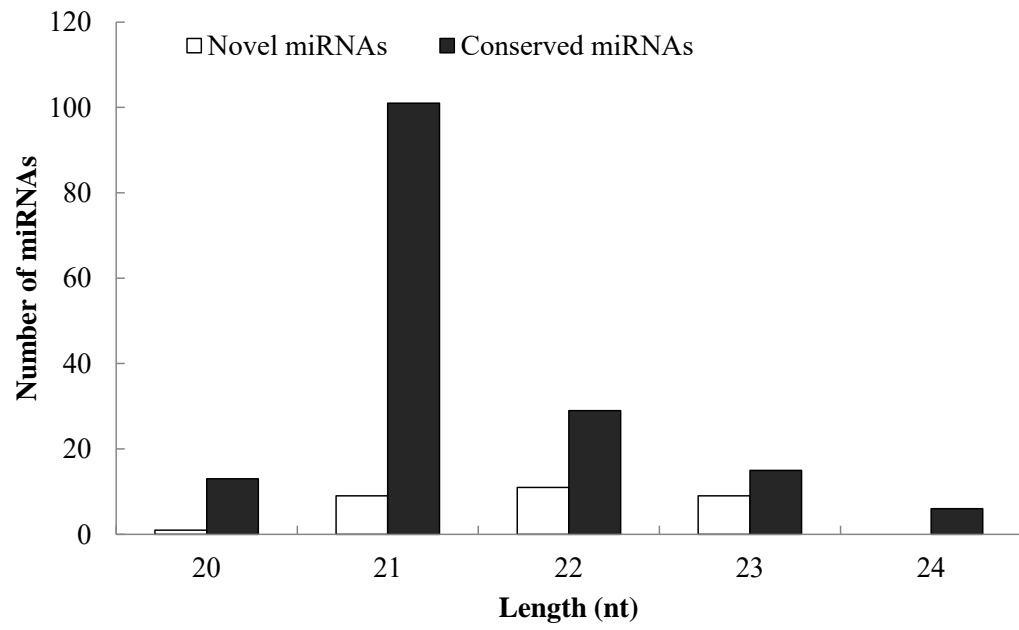

**Figure S3.** Length based distribution of known and novel miRNAs in tobacco roots.





















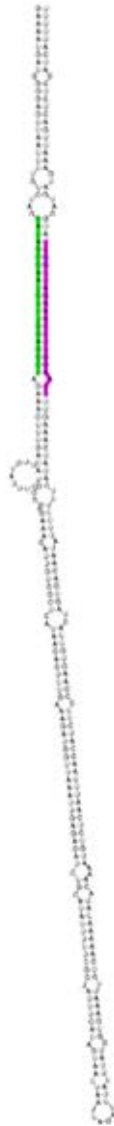

CATAGCCAATCTTTGGAGCCT\_Niben044Scf00017997\_399588\_109107-109127

**novel-miR10**



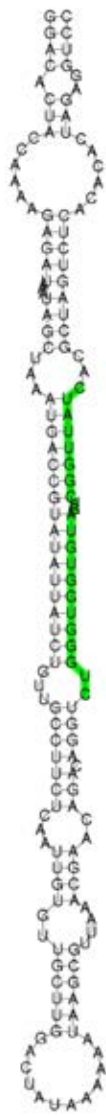

CTGGGTGGTGTAGTCGGTATC\_Niben044Scf00009074\_604417\_219730-219751

**novel-miR12**











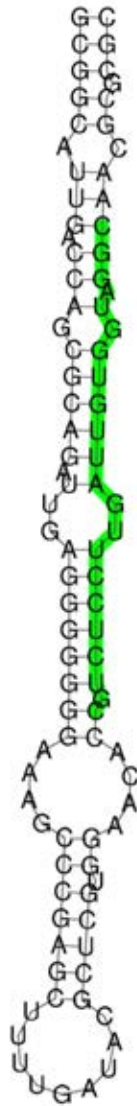

CGTCTCCTTGATTGTGGTAGGC\_Niben044Scf00003611\_445722\_318844-318865

**novel-miR17**





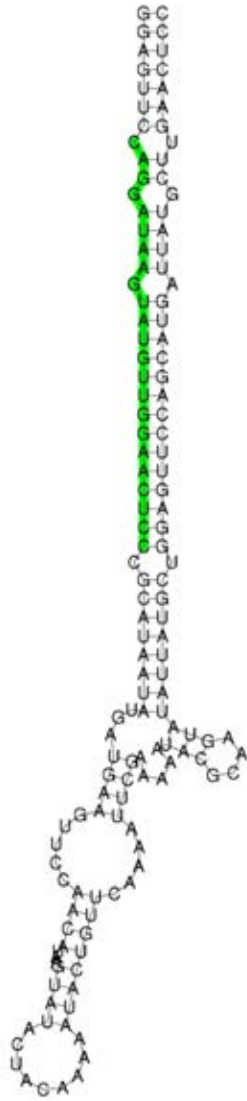

CAGGATAAGTATGTTGGA ACTCC\_Niben044Scf00002190\_346493\_112848-112870

**novel-miR20**

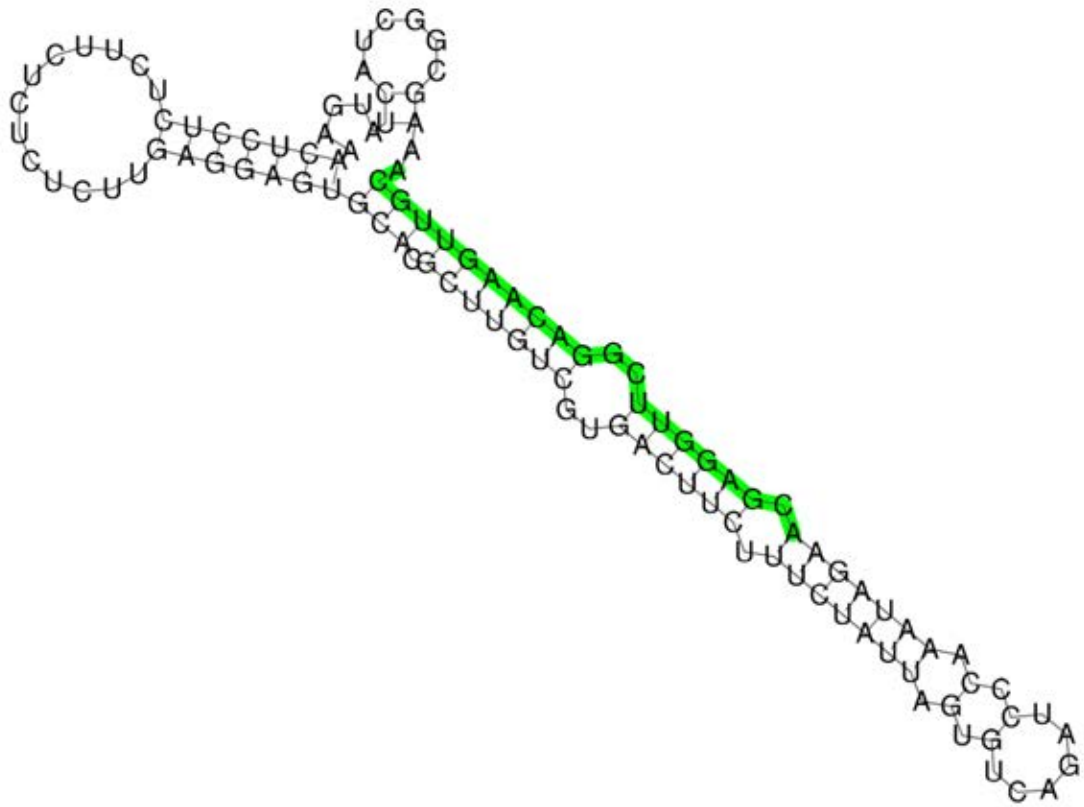

ACGAGGTTCGGACAAGTTGCA\_Niben044Scf00019316\_317706\_167182-167202

**novel-miR21**



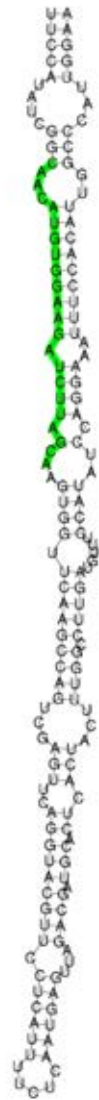

CAACATGTGGAAGATCTTAGCA\_Niben044Scf00003134\_352543\_336479-336500

**novel-miR22**

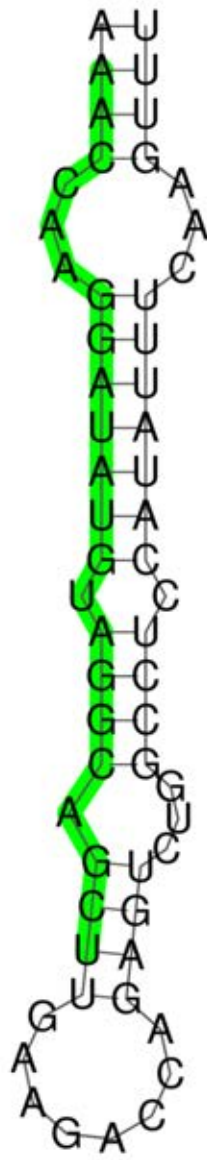

AACCAAGGATATGTAGGCAGCT\_Niben044Scf00016243\_362612\_196130-196151

**novel-miR23**









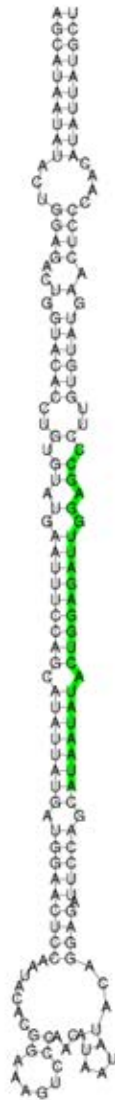

ATAATATACTGGAGATTGGAGCC\_Niben044Scf00012719\_341801\_236835-236857

**novel-miR28**

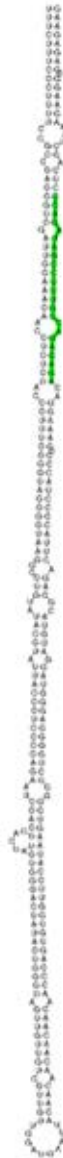

AGAGAGACTGTTTCCGATAGACC\_Niben044Scf00013296\_316665\_20878-20900

**novel-miR29**



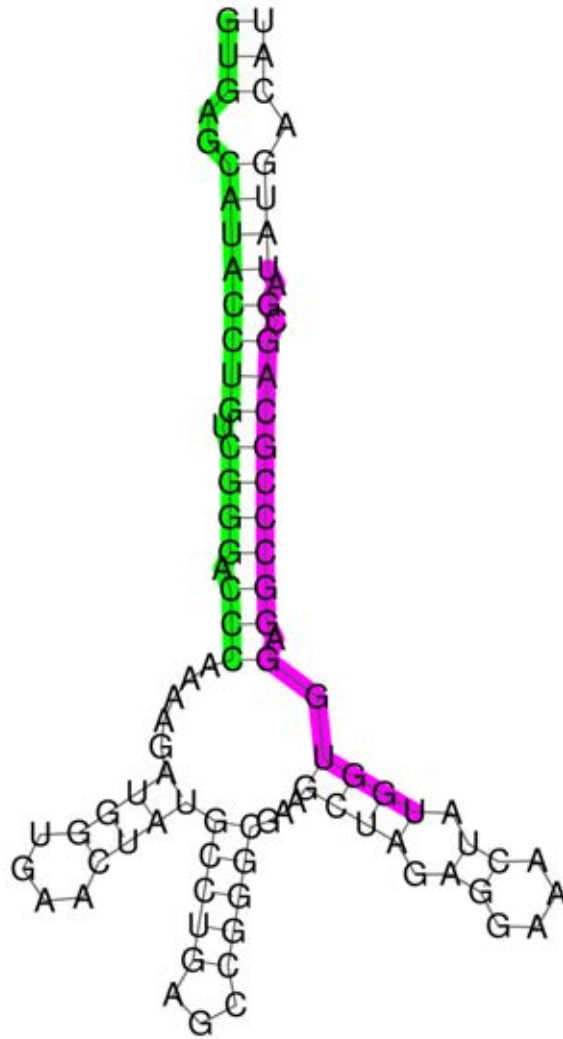

GTGAGCATACCTGTCGGGACCC\_Niben044Scf00003611\_445722\_317845-317866

**novel-miR30**

**Figure S4.** Precursor secondary structure prediction of 30 tobacco novel miRNAs. Green bars indicate the mature miRNAs located in the 3' ends, pink bars indicate mature miRNAs located in the 5' ends, black letters show complementary base pairing (including mismatches).

**Table S1** Effects of Cd on the growth and chlorophyll contents of Guiyan 1 (G) and Yunyan 2 (Y) under control and 50  $\mu$ M Cd conditions at day 5.

| Genotype | Plant height (cm) | Root length (cm) | Fresh weight (g) |         | Dry weight (g) |          | SPAD     | Integrated score* |
|----------|-------------------|------------------|------------------|---------|----------------|----------|----------|-------------------|
|          |                   |                  | Shoot            | Root    | Shoot          | Root     |          |                   |
| G-Cd     | 5.167 a           | 7.750 b          | 0.500ab          | 0.123 a | 0.036 b        | 0.008 ab | 20.733 a | G=43.173          |
| G+Cd     | 3.733 c           | 5.500 c          | 0.285 d          | 0.065 c | 0.021 d        | 0.004 c  | 8.264 c  |                   |
| Y-Cd     | 5.250 a           | 8.100 a          | 0.525 a          | 0.120 a | 0.044 a        | 0.009 a  | 20.443 a | Y=35.077          |
| Y+Cd     | 4.400 b           | 5.500 c          | 0.345 c          | 0.100 b | 0.027 c        | 0.004 c  | 9.313 b  |                   |

\* Integrated score = absolute values of [SPAD value<sup>a</sup>  $\times$  0.1429 + plant height<sup>a</sup>  $\times$  0.1429 + root length<sup>a</sup>  $\times$  0.1429 + fresh weight<sup>a</sup>  $\times$  0.1429 + dry weight<sup>a</sup>  $\times$  0.1429]

(<sup>a</sup>reduced (-)/increased (+) percentage in growth/physiological parameters relative to the controls)

Different letters indicate significant differences (P<0.05) among treatments within two genotypes.

G–Cd, G+Cd, Y-Cd and Y+Cd correspond to hydroponic tobacco Guiyan 1 grown in basic nutrition solution (BNS), Guiyan 1

**Table S2** Known miRNAs expressed in both tobacco genotypes Guiyan 1 (G) and Yunyan 2 (Y) under control and 50  $\mu$ M Cd conditions at day 5.

| Family name | miRNA name            | Sequence               | Length (nt) | TPM <sup>a</sup> |         |         |          | Fold change <sup>b</sup> |          | P-value  |          |
|-------------|-----------------------|------------------------|-------------|------------------|---------|---------|----------|--------------------------|----------|----------|----------|
|             |                       |                        |             | G-Cd             | G+Cd    | Y-Cd    | Y+Cd     | G                        | Y        | G        | Y        |
| miR1446     | nta-miR1446           | UGAACUCUCUCCUCAUUGGCU  | 22          | 2566.8           | 5477.6  | 3020.0  | 3332.9   | 1.1                      | 0.1      | 4.7E-232 | 0.005392 |
| miR156      | nta-miR156a           | UGACAGAAGAGAGUGAGCAC   | 20          | 587.3            | 786.2   | 597.0   | 782.4    | 0.4                      | 0.4      | 1.15E-07 | 1.84E-05 |
|             | nta-miR156b           | UGACAGAAGAGAGUGAGCAC   | 20          | 518.2            | 912.8   | 449.5   | 856.4    | 0.8                      | 0.9      | 5.45E-14 | 5.1E-24  |
|             | nta-miR156c           | UGACAGAAGAGAGUGAGCAC   | 20          | 449.1            | 880.7   | 519.7   | 858.4    | 1.0                      | 0.7      | 1.1E-20  | 2.26E-13 |
|             | nta-miR156d           | UGACAGAAGAGAGUGAGCAC   | 20          | 573.5            | 878.6   | 477.6   | 815.9    | 0.6                      | 0.8      | 1.39E-11 | 1.87E-16 |
|             | nta-miR156e           | UGACAGAAGAGAGUGAGCAC   | 20          | 563.1            | 856.2   | 414.4   | 851.1    | 0.6                      | 1.0      | 3.69E-13 | 1.79E-29 |
|             | nta-miR156f           | UGACAGAAGAGAAUUGAGCAC  | 20          | 639.1            | 1117.7  | 337.1   | 829.7    | 0.8                      | 1.3      | 2.65E-23 | 2.5E-40  |
|             | nta-miR156g           | UGACAGAAGAUAGAGAGCAC   | 20          | 317.8            | 897.3   | 955.2   | 575.1    | 1.5                      | -0.7     | 2.61E-43 | 3.46E-20 |
|             | nta-miR156h           | UGACAGAAGAUAGAGAGCAC   | 20          | 342.0            | 889.7   | 863.9   | 530.8    | 1.4                      | -0.7     | 1.01E-35 | 9.25E-14 |
|             | nta-miR156i           | UGACAGAAGAUAGAGAGCAC   | 20          | 317.8            | 952.7   | 870.9   | 580.7    | 1.6                      | -0.6     | 6.55E-68 | 4.27E-13 |
|             | nta-miR156j           | UGACAGAAGAUAGAGAGCAC   | 20          | 369.7            | 923.8   | 948.1   | 573.1    | 1.3                      | -0.7     | 1.24E-39 | 9.53E-22 |
| miR159      | nta-miR159            | UUUGGAUUGAAGGGAGCUCUA  | 21          | 49940.8          | 22774.7 | 41676.0 | 9735.2   | -1.1                     | -2.1     | 0        | 0        |
| miR160      | nta-miR160a           | UGCCUGGCUCUCCUGUAUGCCA | 21          | 3700.0           | 3697.0  | 1222.0  | 3261.2   | 0.0                      | 1.4      | 0.056199 | 4.1E-190 |
|             | nta-miR160b           | UGCCUGGCUCUCCUGUAUGCCA | 21          | 3731.0           | 3969.3  | 1467.9  | 3403.5   | 0.1                      | 1.2      | 0.098122 | 3.7E-156 |
|             | nta-miR160c           | UGCCUGGCUCUCCUGUAUGCCA | 21          | 3772.5           | 3848.6  | 1264.2  | 3306.3   | 0.0                      | 1.4      | 0.385231 | 1.4E-180 |
|             | nta-miR160d           | UGCCUGGCUCUCCUGUAUGCCA | 21          | 5019.6           | 5041.9  | 1938.4  | 4733.6   | 0.0                      | 1.3      | 0.633527 | 1.6E-247 |
| miR162      | nta-miR162a           | UCGAUAAACCUCUGCAUCCAG  | 21          | 1340.4           | 1747.3  | 1601.3  | 2606.5   | 0.4                      | 0.7      | 4.29E-06 | 4.92E-45 |
|             | nta-miR162b           | UCGAUAAACCUCUGCAUCCAG  | 21          | 1388.8           | 1970.1  | 1699.6  | 2571.6   | 0.5                      | 0.6      | 7.1E-18  | 1.17E-22 |
| miR164      | nta-miR164a           | UGGAGAAGCAGGGCAGUGCA   | 21          | 3869.2           | 5366.1  | 1460.8  | 5850.5   | 0.5                      | 2.0      | 5.7E-42  | 0        |
|             | nta-miR164b           | UGGAGAAGCAGGGCAGUGCA   | 21          | 3869.2           | 5525.0  | 1573.2  | 5738.8   | 0.5                      | 1.9      | 7.75E-48 | 0        |
|             | nta-miR164c           | UGGAGAAGCAGGGCACAUGCU  | 21          | 3530.7           | 4833.4  | 1720.7  | 4856.8   | 0.5                      | 1.5      | 1.09E-36 | 0        |
| miR166      | nta-miR166a           | UCGGACCAGGCUUCAUUCUCC  | 21          | 49481.3          | 17265.8 | 51937.0 | 6379.0   | -1.5                     | -3.1     | 0        | 0        |
|             | nta-miR166b           | UCGGACCAGGCUUCAUUCUCC  | 21          | 49978.8          | 17303.7 | 51466.5 | 6467.4   | -1.5                     | -3.0     | 0        | 0        |
|             | nta-miR166c           | UCGGACCAGGCUUCAUUCUCC  | 21          | 49723.1          | 17629.6 | 51621.0 | 6216.5   | -1.5                     | -3.1     | 0        | 0        |
|             | nta-miR166d           | UCGGACCAGGCUUCAUUCUCC  | 21          | 49377.6          | 17569.0 | 51649.1 | 6725.6   | -1.5                     | -3.0     | 0        | 0        |
|             | nta-miR166e           | UCGGACCAGGCUUCAUUCUCC  | 21          | 49636.7          | 17318.9 | 52232.0 | 6618.6   | -1.5                     | -3.0     | 0        | 0        |
|             | nta-miR166f           | UCGGACCAGGCUUCAUUCUCC  | 21          | 50676.6          | 18054.1 | 52246.0 | 6390.7   | -1.5                     | -3.1     | 0        | 0        |
|             | nta-miR166g           | UCGGACCAGGCUUCAUUCUCC  | 21          | 50369.1          | 17152.1 | 53095.9 | 6446.0   | -1.6                     | -3.1     | 0        | 0        |
|             | nta-miR166h           | UCGGACCAGGCUUCAUUCUCC  | 21          | 49450.2          | 17091.5 | 53404.9 | 6560.9   | -1.5                     | -3.1     | 0        | 0        |
| miR167      | nta-miR167a           | UGAAGCUGCCAGCAUGAUCUGG | 22          | 1834.4           | 3497.5  | 3265.8  | 6321.6   | 0.9                      | 0.9      | 5.75E-89 | 3.31E-59 |
|             | nta-miR167b           | UGAAGCUGCCAGCAUGAUCUGG | 22          | 1627.2           | 3731.1  | 3567.8  | 6264.4   | 1.2                      | 0.8      | 3.5E-158 | 5.6E-24  |
|             | nta-miR167c           | UGAAGCUGCCAGCAUGAUCUGG | 22          | 1668.6           | 3341.0  | 3041.1  | 6094.9   | 1.0                      | 1.0      | 7.2E-115 | 4.76E-74 |
|             | nta-miR167d           | UGAAGCUGCCAGCAUGAUCUA  | 21          | 1478.6           | 3121.1  | 2458.1  | 5535.6   | 1.1                      | 1.1      | 3.2E-131 | 7.05E-98 |
| miR168      | nta-miR167e           | UGAAGCUGCCAGCAUGAUCUA  | 21          | 1299.0           | 2850.1  | 2486.2  | 5684.8   | 1.1                      | 1.1      | 3.4E-103 | 5.8E-97  |
|             | nta-miR168a           | UCGCUUGGUGCAGGUCGGGAC  | 21          | 7617.6           | 7429.8  | 8533.3  | 5086.3   | 0.0                      | -0.7     | 0.004713 | 9.6E-177 |
|             | nta-miR168b           | UCGCUUGGUGCAGGUCGGGAC  | 21          | 7496.6           | 7604.1  | 8350.7  | 5057.3   | 0.0                      | -0.7     | 0.029621 | 4.4E-148 |
|             | nta-miR168c           | UCGCUUGGUGCAGGUCGGGAC  | 21          | 7627.9           | 7466.5  | 8722.9  | 5021.9   | 0.0                      | -0.8     | 0.07815  | 1.4E-208 |
|             | nta-miR168d           | UCGCUUGGUGCAGGUCGGGAA  | 21          | 3634.3           | 3265.7  | 2521.4  | 2569.4   | -0.2                     | 0.0      | 0.003428 | 0.02425  |
| miR169      | nta-miR168e           | UCGCUUGGUGCAGGUCGGGAA  | 21          | 3606.7           | 3336.5  | 2809.3  | 2553.1   | -0.1                     | -0.1     | 0.060428 | 0.023894 |
|             | nta-miR169a           | CAGCCAAGGAUGACUUGCCGA  | 21          | 310.9            | 1703.0  | 526.7   | 3351.0   | 2.5                      | 2.6      | 1.4E-212 | 4.5E-281 |
|             | nta-miR169b           | CAGCCAAGGAUGACUUGCCGA  | 21          | 276.4            | 1745.5  | 421.4   | 3466.9   | 2.6                      | 3.0      | 9.3E-211 | 0        |
|             | nta-miR169c           | CAGCCAAGGAUGACUUGCCGA  | 21          | 314.4            | 1789.0  | 512.7   | 3251.8   | 2.5                      | 2.6      | 6.6E-248 | 2.6E-287 |
|             | nta-miR169d           | CAGCCAAGGAUGACUUGCCGA  | 21          | 310.9            | 1707.6  | 358.2   | 3349.6   | 2.5                      | 3.2      | 6E-218   | 0        |
|             | nta-miR169e           | CAGCCAAGGAUGACUUGCCGA  | 21          | 307.5            | 1841.2  | 484.6   | 3551.9   | 2.6                      | 2.8      | 2.1E-249 | 0        |
|             | nta-miR169f           | CAGCCAAGGAUGACUUGCCGA  | 21          | 324.7            | 1815.5  | 484.6   | 3474.5   | 2.5                      | 2.8      | 4.6E-222 | 0        |
|             | nta-miR169g           | CAGCCAAGGAUGACUUGCCGA  | 21          | 324.7            | 1690.4  | 393.3   | 3487.7   | 2.4                      | 3.1      | 1.6E-198 | 0        |
|             | nta-miR169h           | CAGCCAAGGAUGACUUGCCGA  | 21          | 266.0            | 1632.7  | 484.6   | 3471.7   | 2.6                      | 2.8      | 3.4E-231 | 2.7E-307 |
|             | nta-miR169i           | CAGCCAAGGAUGACUUGCCGA  | 21          | 300.6            | 1842.6  | 477.6   | 3163.3   | 2.6                      | 2.7      | 4.3E-238 | 3.5E-308 |
|             | nta-miR169j           | CAGCCAAGGAUGACUUGCCGA  | 21          | 245.3            | 1677.0  | 400.3   | 3424.6   | 2.8                      | 3.0      | 6.4E-251 | 0        |
|             | nta-miR169k           | CAGCCAAGGAUGACUUGCCGA  | 21          | 307.5            | 1524.8  | 484.6   | 3175.7   | 2.3                      | 2.7      | 4.2E-167 | 8.7E-298 |
|             | nta-miR169l           | CAGCCAAGGAUGACUUGCCGA  | 21          | 276.4            | 1845.9  | 484.6   | 3402.0   | 2.7                      | 2.8      | 3.1E-270 | 0        |
|             | nta-miR169m           | CAGCCAAGGAUGACUUGCCGA  | 21          | 355.8            | 1760.4  | 491.6   | 3180.8   | 2.3                      | 2.6      | 4.1E-218 | 5E-298   |
|             | nta-miR169n           | CAGCCAAGGAUGACUUGCCGA  | 21          | 304.0            | 1575.0  | 316.0   | 3380.0   | 2.4                      | 3.4      | 3.7E-197 | 0        |
|             | nta-miR169o           | CAGCCAAGGAUGACUUGCCGA  | 21          | 272.9            | 1820.8  | 449.5   | 3307.8   | 2.7                      | 2.8      | 7.4E-259 | 0        |
|             | nta-miR169p           | CAGCCAAGGAUGACUUGCCGG  | 21          | 673.7            | 2480.7  | 765.5   | 4346.5   | 1.9                      | 2.5      | 3.6E-220 | 0        |
| nta-miR169q | CAGCCAAGGAUGACUUGCCGG | 21                     | 690.9       | 2549.2           | 779.6   | 3917.4  | 1.9      | 2.3                      | 2E-216   | 8.2E-302 |          |
| nta-miR169r | CAGCCAAGGAUGACUUGCCGG | 21                     | 639.1       | 2726.2           | 807.7   | 4099.8  | 2.1      | 2.3                      | 1.7E-292 | 0        |          |
| nta-miR169s | CAGCCAAGGAUGACUUGCCGG | 21                     | 639.1       | 2726.2           | 807.7   | 4099.8  | 2.1      | 2.3                      | 1.7E-292 | 0        |          |
| nta-miR169t | UAGCCAAGGAUGACUUGCCUU | 21                     | 925.9       | 2908.5           | 1826.0  | 4490.4  | 1.7      | 1.3                      | 4.6E-214 | 6.6E-158 |          |
| miR171      | nta-miR171a           | UAUUGGUGCGGUUCAUUGAGA  | 21          | 1858.6           | 4603.9  | 2542.4  | 4308.5   | 1.3                      | 0.8      | 1.7E-249 | 7.7E-75  |
|             | nta-miR171b           | UUGAGCCGCGCCAUAUACACU  | 21          | 17632.7          | 59811.2 | 29062.3 | 105410.4 | 1.8                      | 1.9      | 0        | 0        |
|             | nta-miR171c           | UGAUUGAGCCGUGCCAUAUUC  | 21          | 2618.6           | 7008.6  | 4375.5  | 9618.8   | 1.4                      | 1.1      | 0        | 5.7E-282 |
| miR172      | nta-miR172a           | AGAAUCUUGAUGAUGCUGCAG  | 21          | 286.7            | 471.8   | 266.9   | 444.2    | 0.7                      | 0.7      | 2.76E-11 | 4.47E-11 |
|             | nta-miR172b           | AGAAUCAUGAUGAUGCUGCAU  | 21          | 297.1            | 267.1   | 175.6   | 276.9    | -0.2                     | 0.7      | 0.235287 | 2.38E-06 |
|             | nta-miR172c           | AGAAUCUUGAUGAUGCUGCAU  | 21          | 145.1            | 109.1   | 98.3    | 178.8    | -0.5                     | 0.9      | 0.323111 | 9.76E-05 |
|             | nta-miR172d           | AGAAUCUUGAUGAUGCUGCAU  | 21          | 134.7            | 109.6   | 70.2    | 128.5    | -0.3                     | 0.9      | 0.24627  | 0.000325 |
|             | nta-miR172e           | AGAAUCUUGAUGAUGCUGCAU  | 21          | 96.7             | 159.8   | 56.2    | 98.4     | 0.7                      | 0.8      | 0.050239 | 0.003424 |
|             | nta-miR172f           | AGAAUCUUGAUGAUGCUGCAU  | 21          | 100.2            | 101.5   | 91.3    | 91.2     | 0.0                      | 0.0      | 0.18307  | 0.123356 |
|             | nta-miR172g           | AGAAUCUUGAUGAUGCUGCAU  | 21          | 117.5            | 109.3   | 98.3    | 144.1    | -0.1                     | 0.5      | 0.298106 | 0.443078 |
|             | nta-miR172h           | AGAAUCUUGAUGAUGCUGCAU  | 21          | 107.1            | 126.0   | 28.1    | 120.9    | 0.2                      | 2.1      | 0.286606 | 6.2E-13  |
|             | nta-miR172i           | AGAAUCUUGAUGAUGCUGCAU  | 21          | 96.7             | 118.1   | 105.3   | 134.9    | 0.3                      | 0.3      | 0.194279 | 0.258408 |
|             | nta-miR172j           | GGAAUCUUGAUGAUGCUGCAU  | 21          | 224.6            | 281.4   | 252.8   | 284.4    | 0.3                      | 0.2      | 0.315909 | 0.389459 |
| miR1919     | nta-miR1919           | GAGCGAGUCAUCUGUGACAGG  | 21          | 5492.9           | 6021.9  | 2865.5  | 8580.2   | 0.1                      | 1.6      | 0.03878  | 0        |
| miR319      | nta-miR319a           | UUGGACUGAAGGGAGCUCUCCU | 21          | 7914.7           | 5074.6  | 17565.2 | 3011.8   | -0.6                     | -2.5     | 8.9E-130 | 0        |
|             | nta-miR319b           | UUGGACUGAAGGGAGCUCUCCU | 21          | 8246.3           | 4740.4  | 16919.0 | 2893.1   | -0.8                     | -2.6     | 6.8E-209 | 0        |
| miR390      | nta-miR390a           | AAGCUCAGGAGGGAUAGCACC  | 21          | 2984.8           | 3748.9  | 3048.1  | 3285.0   | 0.3                      | 0.1      | 7.15E-18 | 0.052499 |
|             | nta-miR390b           | AAGCUCAGGAGGGAUAGCACC  | 21          | 2418.3           | 3518.5  | 1861.2  | 3809.6   | 0.5                      | 1.0      | 2.78E-46 | 3E-103   |
|             | nta-miR390c           | AAGCUCAGGAGGGAUAGCACC  | 21          | 2207.5           | 3617.4  | 2092.9  | 4018.0   | 0.7                      | 0.9      | 7.7E-69  | 8.45E-84 |
| miR394      | nta-miR394            | UUGGCAUUCUGUCCACCUC    | 20          | 5171.6           | 16375.7 | 3279.9  | 14625.2  | 1.7                      | 2.1      | 0        | 0        |
| miR395      | nta-miR395a           | CUGAAGUGUUUGGGGGAACUC  | 21          | 1109.0           | 1032.9  | 484.6   | 816.0    | -0.1                     | 0.7      | 0.492002 | 3.84E-15 |
|             | nta-miR395b           | CUGAAGUGUUUGGGGGAACUC  | 21          | 984.6            | 1101.1  | 575.9   | 672.8    | 0.2                      | 0.2      | 0.014945 | 0.041556 |
|             | nta-miR395c           | CUGAAGUGUUUGGGGGAACUC  | 21          | 1070.9           | 970.4   | 470.6   | 717.3    | -0.2                     | 0.6      | 0.33554  | 1.56E-10 |
| miR396      | nta-miR396a           | UUCCACAGCUUUCUUGAACUG  | 21          | 6356.6           | 4040.3  | 11174.0 | 2444.9   | -0.7                     | -2.2     | 9.7E-97  | 0        |
|             | nta-miR396b           | UUCCACAGCUUUCUUGAACUG  | 21          | 1178.0           | 955.9   | 2380.9  | 1020.0   | -0.3                     | -1.2     | 5.04E-06 | 5.5E-107 |
|             | nta-miR396c           | UUCCACAGCUUUCUUGAACUG  | 21          | 1223.0           | 962.4   | 2416.0  | 1057.6   | -0.4                     | -1.2     | 0.078174 | 2E-99    |
| miR397      | nta-miR397            | AUUGAGUGCAGCGUUGAUGU   | 20          | 1074.4           | 2443.7  | 842.8   | 3390.8   | 1.2                      | 2.0      | 5.6E-115 | 1.8E-228 |
| miR398      | nta-miR398            | UGUGUUCUCAGGUCGCCCCUG  | 21          | 7413.7           | 37620.5 | 6110.2  | 21892.4  | 2.3                      | 1.8      | 0        | 0        |
| miR399      |                       |                        |             |                  |         |         |          |                          |          |          |          |

|         |                |                          |    |         |         |         |         |      |      |          |          |
|---------|----------------|--------------------------|----|---------|---------|---------|---------|------|------|----------|----------|
|         | nta-miR399b    | CGCCAAAGGAGAGCUGCCUG     | 21 | 2283.5  | 5848.6  | 2626.7  | 9163.1  | 1.4  | 1.8  | 0        | 0        |
|         | nta-miR399c    | CGCCAAAGGAGAGCUGCCUG     | 21 | 2242.1  | 5853.2  | 3062.1  | 9166.1  | 1.4  | 1.6  | 0        | 0        |
|         | nta-miR399d    | CGCCAAAGGAGAGCUGCCUG     | 21 | 2207.5  | 5844.9  | 2837.4  | 9505.3  | 1.4  | 1.7  | 0        | 0        |
|         | nta-miR399e    | CGCCAAAGGAGAGCUGCCUG     | 21 | 2262.8  | 5870.3  | 2788.2  | 9524.0  | 1.4  | 1.8  | 0        | 0        |
|         | nta-miR399f    | CGCCAAAGGAGAGCUGCCUG     | 21 | 2397.5  | 5756.3  | 2739.1  | 8771.3  | 1.3  | 1.7  | 5.9E-285 | 0        |
|         | nta-miR399g    | CGCCAAAGGAGAGCUGCCUG     | 21 | 2117.7  | 6062.0  | 2767.2  | 9251.7  | 1.5  | 1.7  | 0        | 0        |
| miR408  | nta-miR408     | UGCACUGCCUCUCCUGGCU      | 21 | 5175.1  | 14667.9 | 2591.6  | 7125.3  | 1.5  | 1.5  | 0        | 0        |
| miR477  | nta-miR477a    | ACUCUCCUCAAGGGCUUCUG     | 21 | 2874.3  | 4412.6  | 1826.0  | 4435.1  | 0.6  | 1.3  | 2.1E-69  | 1.4E-163 |
|         | nta-miR477b    | UCUCUCCUCAAGGGCUUCUC     | 21 | 1875.9  | 4657.4  | 1812.0  | 3512.2  | 1.3  | 0.9  | 2.6E-225 | 5.85E-74 |
| miR479  | nta-miR479a    | CGUGAUUUUGGUUUGGCUCAUC   | 22 | 2076.3  | 2925.7  | 1868.2  | 2898.5  | 0.5  | 0.6  | 3.91E-25 | 6.05E-24 |
|         | nta-miR479b    | CGUGAUUUUGGUUUGGCUCAUC   | 22 | 10039.3 | 15528.6 | 17003.3 | 47797.2 | 0.6  | 1.5  | 3.4E-157 | 0        |
| miR482  | nta-miR482a    | UUUCCAAUCCACCCAUUCCUA    | 22 | 801.5   | 1741.7  | 744.5   | 1505.3  | 1.1  | 1.0  | 5.25E-66 | 3.63E-38 |
|         | nta-miR482b-3f | UCUUGCCAAUGCCAUCUCCAUUCC | 22 | 4739.8  | 18640.0 | 5906.6  | 16517.6 | 2.0  | 1.5  | 0        | 0        |
|         | nta-miR482b-5f | AGUGGGUGGAGUGGUAAGUA     | 21 | 1945.0  | 3846.6  | 1397.6  | 5685.2  | 1.0  | 2.0  | 1.4E-134 | 0        |
|         | nta-miR482c    | UUUCCAAUCCACCCAUUCCUA    | 22 | 839.5   | 2476.3  | 962.2   | 2531.9  | 1.6  | 1.4  | 1.3E-165 | 2.9E-140 |
|         | nta-miR482d    | UUCCCAGUCCCCCAUACCAC     | 22 | 13818.7 | 53137.0 | 36640.4 | 95327.1 | 1.9  | 1.4  | 0        | 0        |
| miR5303 | nta-miR5303a   | AAAAUGUGGCCGGAUACGUGU    | 21 | 4194.0  | 8398.0  | 2001.6  | 6309.2  | 1.0  | 1.6  | 1.2E-183 | 0        |
|         | nta-miR5303b   | AAAAUGUGGCCGGAUACGUGU    | 21 | 4211.2  | 8476.4  | 1966.5  | 6493.5  | 1.0  | 1.7  | 8.5E-189 | 0        |
|         | nta-miR5303c   | ACGGGUGCGGCUACAUUUUGG    | 21 | 17183.5 | 12890.8 | 4431.7  | 11421.8 | -0.4 | 1.4  | 3.2E-137 | 0        |
| miR6019 | nta-miR6019a   | UACAGGUGACUUGUAAAUGUUU   | 22 | 715.1   | 2459.1  | 1320.4  | 1770.4  | 1.8  | 0.4  | 6.5E-193 | 1.6E-10  |
|         | nta-miR6019b   | UACAGGUGACUUGUAAAUGUUU   | 22 | 677.1   | 2155.5  | 1116.7  | 1426.0  | 1.7  | 0.4  | 7.3E-165 | 2.29E-09 |
| miR6020 | nta-miR6020a-3 | AGAUACUCAGCAAACAUAUUAC   | 22 | 690.9   | 1142.5  | 597.0   | 1656.0  | 0.7  | 1.5  | 6.8E-14  | 4.4E-100 |
|         | nta-miR6020a-5 | AAAUGUUUUUCGAGUAUCUUC    | 21 | 1706.6  | 529.3   | 273.9   | 621.5   | -1.7 | 1.2  | 2.2E-131 | 4.23E-24 |
|         | nta-miR6020b   | AAAUGUUCUUCGAGUAUCUUC    | 21 | 2860.5  | 1944.1  | 1215.0  | 2303.8  | -0.6 | 0.9  | 2.03E-27 | 2.79E-54 |
| miR6021 | nta-miR6021    | UUGGAAGAGGCUGCUAUUGGA    | 21 | 2812.1  | 2986.0  | 2008.7  | 5151.3  | 0.1  | 1.4  | 0.394606 | 2.4E-260 |
| miR6024 | nta-miR6024    | UUUUAGCCAGAGUUGUUUUC     | 22 | 15048.6 | 24909.6 | 18653.8 | 30446.5 | 0.6  | 0.7  | 3.07E-11 | 0        |
| miR6025 | nta-miR6025a   | UACCAACAAUUGAGAUACAUC    | 22 | 894.8   | 3582.3  | 1524.0  | 2315.0  | 2.0  | 0.6  | 2.2E-298 | 2.47E-28 |
|         | nta-miR6025b   | UGCCAACUUAUGAGAUACAUC    | 22 | 666.8   | 2147.0  | 884.9   | 1614.2  | 1.7  | 0.9  | 2.8E-145 | 4.08E-47 |
|         | nta-miR6025c   | UCAAUUGAGAUACAUCUAGU     | 22 | 936.2   | 1358.6  | 1278.2  | 1125.0  | 0.5  | -0.2 | 1.18E-15 | 0.184688 |
|         | nta-miR6025d   | AACAAUUGAGAUACAUCUAGG    | 23 | 473.3   | 393.7   | 723.4   | 325.2   | -0.3 | -1.2 | 0.016957 | 1.09E-25 |
|         | nta-miR6025e   | UGCCAUUUAUGAGAUACAUC     | 23 | 739.3   | 2139.2  | 1179.9  | 1384.9  | 1.5  | 0.2  | 1.8E-153 | 0.018048 |
| miR6144 | nta-miR6144    | UGGCAACUUCUUAUCAUGCC     | 22 | 1053.7  | 2535.2  | 1201.0  | 2361.0  | 1.3  | 1.0  | 1E-121   | 2.13E-73 |
| miR6145 | nta-miR6145a   | CAUUUUCACAUGUAGCACUGAC   | 23 | 1281.7  | 1639.7  | 884.9   | 1429.3  | 0.4  | 0.7  | 8.08E-11 | 5.25E-14 |
|         | nta-miR6145b   | UUAUCAUACGUAGCACUAGCC    | 21 | 1278.2  | 1933.4  | 1467.9  | 1762.4  | 0.6  | 0.3  | 1.14E-24 | 3.9E-07  |
|         | nta-miR6145c   | CAGUGCACAUAUAACAGUAA     | 20 | 207.3   | 368.6   | 358.2   | 565.5   | 0.8  | 0.6  | 5.05E-09 | 0.000361 |
|         | nta-miR6145d   | AUUGUUACAUGUAACACUGGC    | 21 | 953.5   | 1187.1  | 934.1   | 2099.7  | 0.3  | 1.2  | 0.003488 | 2.24E-91 |
|         | nta-miR6145e   | AUUGUUACAUGUAGCACUGGC    | 21 | 18468.7 | 11841.6 | 16954.2 | 5620.0  | -0.6 | -1.6 | 3.6E-303 | 0        |
|         | nta-miR6145f   | AUCGUAACAUAUAGCACUAGC    | 21 | 321.3   | 512.3   | 463.5   | 653.7   | 0.7  | 0.5  | 9.8E-06  | 2.01E-06 |
| miR6146 | nta-miR6146a   | UUUGUCCAAUGAAACACUUAUC   | 23 | 1026.0  | 839.5   | 1706.7  | 734.4   | -0.3 | -1.2 | 0.000844 | 5.4E-73  |
|         | nta-miR6146b   | UUUGUCCAAUGAAAUACUUAUC   | 23 | 2656.6  | 1137.3  | 1503.0  | 624.5   | -1.2 | -1.3 | 1.3E-131 | 7.95E-69 |
| miR6147 | nta-miR6147    | UGACAUCUUCAAAACCCACUA    | 22 | 563.1   | 1332.7  | 765.5   | 1217.6  | 1.2  | 0.7  | 1.12E-56 | 1.24E-10 |
| miR6148 | nta-miR6148a   | UACGUCGAUCGAUUGUUCUUA    | 22 | 829.1   | 1896.3  | 653.2   | 2040.5  | 1.2  | 1.6  | 1.63E-89 | 5.5E-145 |
|         | nta-miR6148b   | UGUGUUAACGUUUGUUCUCA     | 22 | 1219.5  | 1499.4  | 1552.1  | 1199.6  | 0.3  | -0.4 | 1.51E-05 | 1.05E-05 |
| miR6149 | nta-miR6149a   | UUGAUACGCACCUGAAUCGGC    | 22 | 23011.6 | 8535.6  | 24061.7 | 5060.5  | -1.4 | -2.3 | 0        | 0        |
|         | nta-miR6149b   | UUGAUACGCACCUGAAUCGGC    | 22 | 22994.3 | 8633.4  | 23563.0 | 5245.0  | -1.4 | -2.2 | 0        | 0        |
| miR6150 | nta-miR6150    | AGAUUUGUUUGAUCGUCUUGGC   | 23 | 1482.1  | 1841.2  | 1334.4  | 2153.0  | 0.3  | 0.7  | 2.52E-07 | 1.4E-27  |
| miR6151 | nta-miR6151a   | UGAAUGUGAGGCAUUGGAUUGA   | 23 | 269.5   | 450.8   | 203.7   | 405.3   | 0.7  | 1.0  | 1.27E-05 | 8.75E-15 |
|         | nta-miR6151b   | UGAAUGUGAGGCAUUGGAUUGA   | 23 | 321.3   | 387.3   | 196.7   | 462.8   | 0.3  | 1.2  | 0.333788 | 1.24E-23 |
|         | nta-miR6151c   | UGAAUGUGAGGCAUUGGAUUGA   | 23 | 286.7   | 410.6   | 140.5   | 461.1   | 0.5  | 1.7  | 0.006506 | 3.73E-38 |
|         | nta-miR6151d   | UGAAUGUGAGGCAUUGGAUUGA   | 23 | 362.7   | 436.3   | 168.6   | 441.6   | 0.2  | 1.4  | 0.152726 | 2.66E-28 |
|         | nta-miR6151e   | UGAAUGUGAGGCAUUGGAUUGA   | 23 | 314.4   | 341.8   | 203.7   | 475.8   | 0.1  | 1.2  | 0.346097 | 1.15E-20 |
|         | nta-miR6151f   | UGAGUGUGAGGCAUUGGAUUGA   | 23 | 490.6   | 533.6   | 316.0   | 756.4   | 0.1  | 1.3  | 0.346033 | 6.71E-41 |
|         | nta-miR6151g   | UGAGUGUGAGGCGUUGGAUUGA   | 23 | 2428.6  | 1479.0  | 2380.9  | 1595.1  | -0.7 | -0.6 | 6.15E-50 | 1.13E-29 |
|         | nta-miR6151h   | UGAGUGUGAGGCGUUGGAUUGA   | 23 | 2566.8  | 1330.3  | 2563.5  | 1575.2  | -0.9 | -0.7 | 1.46E-78 | 2.3E-39  |
|         | nta-miR6151i   | UGAGUGUGAGGCGUUGGAUUGA   | 23 | 2376.8  | 1453.1  | 2640.7  | 1732.3  | -0.7 | -0.6 | 3.67E-46 | 5.05E-29 |
| miR6152 | nta-miR6152a   | UAUUGUAUUCGACUGUAUUCAC   | 24 | 535.5   | 789.1   | 590.0   | 1053.3  | 0.6  | 0.8  | 3.52E-10 | 2.89E-13 |
|         | nta-miR6152b   | UAUUGUAUUCGACUGUAUUCAC   | 24 | 507.8   | 746.5   | 618.0   | 1022.8  | 0.5  | 0.7  | 0.000218 | 1.65E-15 |
| miR6153 | nta-miR6153    | UAGGACCAUAUUCACUAUUUG    | 21 | 2725.7  | 2833.3  | 5127.0  | 3972.7  | 0.1  | -0.4 | 0.345726 | 2.28E-24 |
| miR6154 | nta-miR6154a   | UGGGUCUCCUGGAGAAAGGUC    | 21 | 2097.0  | 4601.7  | 1889.3  | 3961.7  | 1.1  | 1.1  | 2.3E-175 | 5.8E-144 |
|         | nta-miR6154b   | UGGGUCUCCUGGAGAAAGGUC    | 21 | 2114.3  | 4479.7  | 1875.2  | 3939.0  | 1.1  | 1.1  | 4.1E-170 | 4.8E-120 |
| miR6155 | nta-miR6155    | UAAGGUUGCCUUGCUCUUGCA    | 21 | 2266.3  | 4207.9  | 1790.9  | 4090.0  | 0.9  | 1.2  | 1.6E-111 | 1.1E-177 |
| miR6156 | nta-miR6156    | UUGAAGAUGUUCUAUUUCUGU    | 21 | 224.6   | 447.3   | 238.8   | 440.3   | 1.0  | 0.9  | 2.57E-15 | 1.75E-11 |
| miR6157 | nta-miR6157    | UGGUAGACGUAGGAUUUGAAGA   | 22 | 2007.2  | 2596.5  | 1566.2  | 2183.5  | 0.4  | 0.4  | 5.45E-11 | 0.004925 |
| miR6158 | nta-miR6158a   | AAGUUCGAUUUGUACGAAGGGC   | 22 | 1419.9  | 3813.9  | 1425.7  | 3911.6  | 1.4  | 1.4  | 7.7E-235 | 1.9E-198 |
|         | nta-miR6158b   | AAGUUCGAUUUGUACGAAGGGC   | 22 | 1402.6  | 3871.7  | 1474.9  | 3827.0  | 1.5  | 1.4  | 8.7E-249 | 2E-185   |
|         | nta-miR6158c   | AAGUUCGAUUUGUACGAAGGGC   | 22 | 1433.7  | 3949.0  | 1503.0  | 3964.5  | 1.5  | 1.4  | 8.7E-242 | 3.3E-172 |
| miR6159 | nta-miR6159    | UAGCAUAGAAUUCUCGCCCUA    | 22 | 3043.6  | 4947.8  | 4466.8  | 3393.1  | 0.7  | -0.4 | 5.75E-87 | 1.32E-30 |
| miR6160 | nta-miR6160    | GCAUAUAUGGGCCAACUGUGUA   | 24 | 3675.8  | 7230.8  | 2605.6  | 5028.3  | 1.0  | 0.9  | 4.7E-243 | 6.2E-123 |
| miR6161 | nta-miR6161a   | GCUGGACCGUAUACUUUGCUG    | 24 | 3672.3  | 4980.4  | 2626.7  | 5502.0  | 0.4  | 1.1  | 2.43E-44 | 1.2E-216 |
|         | nta-miR6161b   | GCUGGACCGUAUACUUUGCUG    | 24 | 3503.0  | 4964.9  | 2514.3  | 5309.3  | 0.5  | 1.1  | 1.3E-49  | 2.9E-195 |
|         | nta-miR6161c   | AAUAUACUGGAGUUCGGUGCAC   | 24 | 6494.8  | 9666.0  | 4228.0  | 8858.7  | 0.6  | 1.1  | 3.9E-133 | 0        |
|         | nta-miR6161d   | UGAACUCCAGCAUAUUUAUCU    | 21 | 863.7   | 2632.0  | 1812.0  | 2213.5  | 1.6  | 0.3  | 1.3E-196 | 0.341485 |
| miR6162 | nta-miR6162    | AGAAAAAUGGUAGCCAUUGGA    | 21 | 2577.2  | 3478.9  | 1826.0  | 3205.7  | 0.4  | 0.8  | 1.53E-25 | 2.36E-65 |
| miR6163 | nta-miR6163    | UGGAAGUACUGCCUAGUUUGA    | 22 | 1793.0  | 2509.2  | 2689.9  | 2608.9  | 0.5  | 0.0  | 9E-12    | 0.320612 |
| miR6164 | nta-miR6164a   | UCACAUAAAUUGAAACGGAGG    | 21 | 407.7   | 851.5   | 435.4   | 768.4   | 1.1  | 0.8  | 4.2E-31  | 9.75E-12 |
|         | nta-miR6164b   | UCACAUAAAUUGAAACGGAGG    | 21 | 414.6   | 762.8   | 393.3   | 848.4   | 0.9  | 1.1  | 6.51E-24 | 1.64E-33 |
| miR827  | nta-miR827     | UUAGAUGAACAUCAACAAACA    | 21 | 545.8   | 531.6   | 428.4   | 781.2   | 0.0  | 0.9  | 0.531752 | 2.72E-16 |

<sup>a</sup>TPM value indicates the expression level of miRNA; TPM value = counts of this miRNA/ total counts of this sample×100000.

<sup>b</sup>Fold change (Cd vs Control) is  $\log_2 N$ ,  $\log_2 N \geq 1.5$  are up-regulated and  $0 < |\log_2 N| < 1.5$  are unchanged and  $\log_2 N \leq -1.5$  are down-regulated,  $p < 0.01$ .

G-Cd, G+Cd, Y-Cd and Y+Cd correspond to hydroponic tobacco Guiyan 1 grown in basic nutrition solution (BNS), Guiyan 1 in BNS+ 50μM Cd, Yunyan 2 in BNS and Yunyan 2 in BNS + 50μM Cd, respectively.

**Table S3** Novel miRNAs expressed in both tobacco genotypes Guiyan1 (G) and Yunyan2 (Y) under control and 50  $\mu$ M Cd conditions at day 5.

| miRNA name  | Chromosome                 | Start  | End    | Orientation | Abundance | Sequence                | Length (nt) | Genomic h | Hairpin l | Hairpin G | Minimum f | Adjusted | Randfold | miRNA*    | TPM <sup>a</sup> |       |       |       | Fold change <sup>b</sup> |      |
|-------------|----------------------------|--------|--------|-------------|-----------|-------------------------|-------------|-----------|-----------|-----------|-----------|----------|----------|-----------|------------------|-------|-------|-------|--------------------------|------|
|             |                            |        |        |             |           |                         |             |           |           |           |           |          |          |           | G-Cd             | G+Cd  | Y-Cd  | Y+Cd  | G                        | Y    |
| novel-miR1  | Niben044Scf00002137_350188 | 32708  | 32728  | +           | 403       | ATCATGCTATCCCTTTGGACT   | 21          | 2         | 126       | 40.5      | -54.6     | -43.3    | 0.009901 | TCCAAAGGG | 122.8            | 123.2 | 129.5 | 130.5 | 1.0                      | 1.0  |
| novel-miR2  | Niben044Scf00014823_335993 | 245585 | 245605 | +           | 246       | GGAATGTTGTCTGGCTCGAGG   | 21          | 1         | 209       | 34.9      | -74.6     | -35.7    | 0.009901 | NO        | 37.5             | 37.5  | 41.4  | 39.6  | 1.0                      | 0.0  |
| novel-miR3  | Niben044Scf00004045_395210 | 262611 | 262633 | +           | 16        | CTAGAACTCCAGCATAATATACT | 23          | 7         | 87        | 35.6      | -28.2     | -32.4    | 0.009901 | NO        | 9.8              | 10.1  | 10.4  | 9.8   | 1.0                      | -0.1 |
| novel-miR4  | Niben044Scf00004103_360652 | 102876 | 102897 | +           | 15        | TCCACATCCTTGTGATAAAGCT  | 22          | 10        | 89        | 43.8      | -29.6     | -33.3    | 0.009901 | NO        | 9.1              | 8.8   | 9.7   | 9.1   | 0.0                      | -0.1 |
| novel-miR5  | Niben044Scf00023006_384368 | 116423 | 116443 | +           | 41        | TTGTGAGACAAAAAGAAGCCT   | 21          | 1         | 152       | 38.2      | -87.4     | -57.5    | 0.009901 | NO        | 6.2              | 6.4   | 6.6   | 6.5   | 1.0                      | 0.0  |
| novel-miR6  | Niben044Scf00002137_350188 | 32634  | 32654  | +           | 18        | TCCAAAGGGATCGCATTGATC   | 21          | 2         | 117       | 40.2      | -52.1     | -44.5    | 0.009901 | GATCATGCT | 5.5              | 5.8   | 5.5   | 5.7   | 0.9                      | 1.0  |
| novel-miR7  | Niben044Scf00012994_341128 | 316112 | 316134 | -           | 28        | ATTTGGTCTAGTGGTATGATTCT | 23          | 2         | 86        | 37.2      | -21.7     | -25.2    | 0.009901 | NO        | 4.3              | 4.4   | 4.7   | 4.6   | 1.0                      | 0.0  |
| novel-miR8  | Niben044Scf00001682_380483 | 208795 | 208815 | -           | 13        | TTGGTGATATTTCTTCGGATT   | 21          | 4         | 210       | 30.5      | -122.1    | -58.1    | 0.009901 | NO        | 4.0              | 5.2   | 4.1   | 5.4   | 0.8                      | 0.8  |
| novel-miR9  | Niben044Scf00006151_355967 | 99678  | 99698  | +           | 10        | TTCTTTGGACAAGTAGCACC    | 21          | 2         | 233       | 34.8      | -139.4    | -59.8    | 0.009901 | NO        | 3.0              | 3.1   | 3.1   | 3.1   | 1.0                      | 1.0  |
| novel-miR10 | Niben044Scf00017997_399588 | 109107 | 109127 | +           | 15        | CATAGCCAATCTTTGGAGCCT   | 21          | 1         | 313       | 31.0      | -162.4    | -51.9    | 0.009901 | TCAAGGTC  | 2.3              | 2.3   | 2.4   | 2.4   | 1.0                      | 0.0  |
| novel-miR11 | Niben044Scf00002443_315754 | 205534 | 205556 | -           | 10        | TATCGGTTTAGCTCTTATCGGGC | 23          | 1         | 112       | 45.5      | -34.7     | -31.0    | 0.049505 | NO        | 1.5              | 1.5   | 1.6   | 1.7   | 1.0                      | 0.9  |
| novel-miR12 | Niben044Scf00009074_604417 | 219730 | 219751 | -           | 9         | CTGGGTGGTGTAGTCGGTTATC  | 22          | 1         | 155       | 41.3      | -42.0     | -27.1    | 0.029703 | NO        | 1.4              | 1.4   | 1.6   | 1.6   | 1.0                      | 1.0  |
| novel-miR13 | Niben044Scf00006338_477699 | 443234 | 443256 | -           | 8         | TTAACTTTTGAAGTGGAACTCA  | 23          | 8         | 208       | 33.2      | -85.0     | -40.9    | 0.009901 | NO        | 1.2              | 1.3   | 1.4   | 1.2   | 0.9                      | -0.1 |
| novel-miR14 | Niben044Scf00002388_322526 | 310689 | 310711 | -           | 8         | GATACATGTGTCGAGAAGACTT  | 23          | 2         | 139       | 30.9      | -41.5     | -29.9    | 0.009901 | NO        | 1.2              | 1.3   | 1.4   | 1.3   | 0.9                      | -0.1 |
| novel-miR15 | Niben044Scf00003359_572295 | 508425 | 508446 | -           | 7         | TGAAGAAGATGAAGTAGCACC   | 22          | 6         | 55        | 45.5      | -17.0     | -30.9    | 0.019802 | NO        | 1.1              | 1.1   | 1.2   | 1.2   | 1.0                      | 1.0  |
| novel-miR16 | Niben044Scf00002583_361192 | 317931 | 317951 | +           | 6         | AATCCGAGCCCCACATTCATC   | 21          | 1         | 97        | 45.4      | -50.3     | -51.9    | 0.009901 | NO        | 0.9              | 1.0   | 0.9   | 0.9   | 0.9                      | 1.0  |
| novel-miR17 | Niben044Scf00003611_445722 | 318844 | 318865 | +           | 21        | CGTCTCCTGATTGTGGTAGGC   | 22          | 2         | 95        | 60.0      | -38.9     | -40.9    | 0.009901 | NO        | 3.2              | 3.4   | 0.0   | 3.3   | —                        | ↑    |
| novel-miR18 | Niben044Scf00004802_433360 | 238081 | 238103 | -           | 12        | AAGGATTCAGGTAGAGCTGCTT  | 23          | 1         | 73        | 43.8      | -18.7     | -25.6    | 0.09901  | NO        | 1.8              | 1.9   | 0.0   | 1.1   | —                        | ↑    |
| novel-miR19 | Niben044Scf00000377_326229 | 90708  | 90729  | +           | 5         | TATTTGTAGGAAAAGGTTACCT  | 22          | 3         | 50        | 40.0      | -16.1     | -32.2    | 0.029703 | NO        | 1.5              | 0.0   | 1.7   | 0.0   | ↓                        | ↓    |
| novel-miR20 | Niben044Scf00002190_346493 | 112848 | 112870 | -           | 10        | CAGGATAAGTATGTTGGAAGTCC | 23          | 3         | 142       | 35.9      | -54.8     | -38.6    | 0.009901 | NO        | 1.5              | 0.7   | 0.0   | 0.0   | —                        | —    |
| novel-miR21 | Niben044Scf00019316_317706 | 167182 | 167202 | +           | 5         | ACGAGGTTTCGGACAAGTTGCA  | 21          | 5         | 111       | 45.9      | -34.3     | -30.9    | 0.009901 | NO        | 0.8              | 0.8   | 0.0   | 0.4   | —                        | ↑    |
| novel-miR22 | Niben044Scf00003134_352543 | 336479 | 336500 | -           | 5         | CAACATGTGGAAGATCTTAGCA  | 22          | 5         | 155       | 43.9      | -47.2     | -30.5    | 0.009901 | NO        | 0.8              | 0.8   | 0.0   | 0.9   | —                        | ↑    |
| novel-miR23 | Niben044Scf00016243_362612 | 196130 | 196151 | +           | 5         | AACCAAGGATATGTAGGCAGCT  | 22          | 4         | 58        | 43.1      | -14.7     | -25.3    | 0.089109 | NO        | 0.8              | 0.0   | 0.0   | 0.0   | ↓                        | —    |
| novel-miR24 | Niben044Scf00022866_467875 | 216492 | 216511 | -           | 106       | TCCAGCGGCTGGAAGAGCAC    | 20          | 1         | 153       | 56.2      | -52.4     | -34.2    | 0.089109 | NO        | 0.0              | 0.0   | 18.3  | 8.7   | —                        | —    |
| novel-miR25 | Niben044Scf00004550_314476 | 73035  | 73056  | -           | 7         | TATTATGCTGGACCGGTATACT  | 22          | 12        | 63        | 36.5      | -22.1     | -35.1    | 0.01     | NO        | 0.0              | 0.0   | 3.6   | 0.0   | —                        | ↓    |
| novel-miR26 | Niben044Scf00009193_366732 | 292363 | 292384 | +           | 18        | TGAGTGTGAGCGGTTGGATTGA  | 22          | 1         | 199       | 41.7      | -78.9     | -39.7    | 0.009901 | AATCCAAGC | 0.0              | 2.8   | 3.1   | 3.0   | ↑                        | —    |
| novel-miR27 | Niben044Scf00003611_445722 | 318843 | 318864 | +           | 18        | CCGTCCTTGATTGTGGTAGG    | 22          | 2         | 124       | 62.1      | -51.8     | -41.8    | 0.089109 | NO        | 0.0              | 0.0   | 3.1   | 0.0   | —                        | ↓    |
| novel-miR28 | Niben044Scf00012719_341801 | 236835 | 236857 | +           | 5         | ATAATATACTGGAGATTGGAGCC | 23          | 1         | 159       | 39.0      | -54.6     | -34.3    | 0.009901 | NO        | 0.0              | 0.0   | 0.9   | 0.4   | —                        | —    |
| novel-miR29 | Niben044Scf00013296_316665 | 20878  | 20900  | +           | 79        | AGAGAGACTGTTCCGATAGACC  | 23          | 4         | 283       | 49.1      | -184.1    | -65.1    | 0.009901 | NO        | 0.0              | 0.0   | 0.0   | 7.0   | —                        | ↑    |
| novel-miR30 | Niben044Scf00003611_445722 | 317845 | 317866 | +           | 149       | GTGAGCATACCTGTCGGGACCC  | 22          | 2         | 96        | 55.2      | -29.0     | -30.2    | 0.089109 | TGGTGGAGG | 0.0              | 0.0   | 0.0   | 12.7  | —                        | ↑    |

<sup>a</sup>TPM value indicates the expression level of miRNA; TPM value = counts of this miRNA/ total counts of this sample×1000000.

<sup>b</sup>Fold change (Cd vs Control) is  $\log_2N$ ,  $\log_2N \geq 1.5$  are up-regulated and  $0 < |\log_2N| < 1.5$  are unchanged and  $\log_2N \leq -1.5$  are down-regulated,  $p < 0.01$ .

“↑” indicates only expressed in Cd-treated, “↓” only expressed in control, “-” not expressed in both conditions or unchanged.

G-Cd, G+Cd, Y-Cd and Y+Cd correspond to hydroponic tobacco Guiyan 1 grown in basic nutrition solution (BNS), Guiyan 1 in BNS+ 50 $\mu$ M Cd, Yunyan 2 in BNS and Yunyan 2 in BNS + 50 $\mu$ M Cd, respectively.



**Table S5** Targets prediction of known miRNAs.

| Family name | miRNA name                  | Target gene | Gene length (nt) | Tot score | Tot energ | Max score | Max energ | Positions   | Description                                                              |
|-------------|-----------------------------|-------------|------------------|-----------|-----------|-----------|-----------|-------------|--------------------------------------------------------------------------|
| miR1446     | nta-miR1446                 | TC125184    | 905              | 495       | -71.7     | 172       | -26.1     | 341 113 793 | Ubiquitin ( <i>S. lycopersicum</i> )                                     |
| miR156      | nta-miR156a/b/c/d/e/f/g/h/i | TC152836    | 640              | 182       | -35.3     | 182       | -35.3     | 405         | Squamosa promoter-binding-like protein 12 ( <i>O. sativa</i> )           |
| miR159      | nta-miR159                  | TC148124    | 1696             | 179       | -30.7     | 179       | -30.7     | 431         | TGA10 transcription factor ( <i>N. tabacum</i> )                         |
|             |                             | TC154362    | 664              | 179       | -30.7     | 179       | -30.7     | 521         |                                                                          |
|             |                             | EB446223    | 878              | 179       | -30.7     | 179       | -30.7     | 462         |                                                                          |
|             |                             | FG172155    | 796              | 163       | -20.7     | 163       | -20.7     | 697         |                                                                          |
| miR160      | nta-miR160a/b/c/d           | EH663826    | 1004             | 300       | -43.8     | 160       | -23.7     | 189 759     | Kinesin-like protein NACK1 ( <i>N. tabacum</i> )                         |
|             |                             | TC125766    | 3208             | 160       | -23.7     | 160       | -23.7     | 916         |                                                                          |
| miR162      | nta-miR162a/b               | TC169250    | 715              | 182       | -29.1     | 182       | -29.1     | 260         | Auxin-regulated protein-like ( <i>A. thaliana</i> )                      |
| miR164      | nta-miR164a/b/c             | TC156300    | 719              | 187       | -35.8     | 187       | -35.8     | 238         | NAC5 protein ( <i>Glycine max</i> )                                      |
| miR166      | nta-miR166a/b/c/d/e/f/g/h   | TC126889    | 1192             | 191       | -40.6     | 191       | -40.6     | 348         | HD-ZIPIII protein ( <i>N. sylvestris</i> )                               |
| miR167      | nta-miR167a/b/c             | TC131622    | 1731             | 319       | -44.9     | 166       | -23.6     | 384 1132    | Villin 2 ( <i>N. tabacum</i> )                                           |
|             | nta-miR167d/e               | FG138379    | 849              | 335       | -44.8     | 171       | -24.4     | 343 180     | Chromosome chr13 scaffold_17 ( <i>V. vinifera</i> )                      |
|             |                             | FG144930    | 876              | 335       | -44.8     | 171       | -24.4     | 354 106     |                                                                          |
| miR168      | nta-miR168a/b/c/d/e         | TC126364    | 878              | 169       | -30.2     | 169       | -30.2     | 347         | CaMB-channel protein ( <i>N. tabacum</i> )                               |
|             |                             | BP532584    | 431              | 169       | -30.2     | 169       | -30.2     | 52          |                                                                          |
| miR169      | nta-miR169a/b/c/d/e/f/g/h/i | TC164425    | 1619             | 301       | -44.9     | 153       | -24.3     | 1327 832    | Cytochrome P450 like TBP ( <i>N. tabacum</i> )                           |
|             |                             | TC123257    | 1271             | 295       | -40.3     | 148       | -20.3     | 549 704     | Salicylic acid-binding protein 2 ( <i>N. tabacum</i> )                   |
|             |                             | TC128216    | 1040             | 183       | -34.4     | 183       | -34.4     | 561         | CCAAT-binding transcription factor subunit B ( <i>N. tabacum</i> )       |
|             |                             | TC143413    | 1544             | 183       | -34.4     | 183       | -34.4     | 1190        |                                                                          |
|             |                             | TC167045    | 949              | 183       | -34.4     | 183       | -34.4     | 562         |                                                                          |
|             | nta-miR169t                 | NP917237    | 966              | 183       | -34.4     | 183       | -34.4     | 577         |                                                                          |
|             |                             | TC128216    | 1040             | 183       | -34.4     | 183       | -34.4     | 561         | CCAAT-binding transcription factor subunit B ( <i>N. tabacum</i> )       |
|             |                             | TC143413    | 1544             | 183       | -34.4     | 183       | -34.4     | 1190        |                                                                          |
|             |                             | TC167045    | 949              | 183       | -34.4     | 183       | -34.4     | 562         |                                                                          |
|             |                             | NP917237    | 966              | 183       | -34.4     | 183       | -34.4     | 577         |                                                                          |
| miR171      | nta-miR171a                 | TC129266    | 1598             | 334       | -41.9     | 167       | -21.0     | 506 694     | Chromosome chr11 scaffold_13 ( <i>V. vinifera</i> )                      |
|             | nta-miR171b                 | TC134811    | 1014             | 195       | -38.4     | 195       | -38.4     | 407         | Hairy meristem ( <i>Petunia x hybrida</i> )                              |
|             | nta-miR171c                 | TC127385    | 1636             | 191       | -39.5     | 191       | -39.5     | 284         | Chromosome chr15 scaffold_37 ( <i>V. vinifera</i> )                      |
|             |                             | TC134811    | 1014             | 191       | -39.5     | 191       | -39.5     | 410         | Hairy meristem ( <i>Petunia x hybrida</i> )                              |
| miR172      | nta-miR172a/c/d/e/f/g/h/i/j | TC146861    | 813              | 182       | -25.7     | 182       | -25.7     | 277         | MYB transcription factor ( <i>P. latifolia</i> )                         |
|             |                             | FS412876    | 575              | 182       | -25.7     | 182       | -25.7     | 276         | MYB transcription factor MYB149 ( <i>Glycine max</i> )                   |
|             | nta-miR172b                 | AM792182    | 379              | 179       | -23.1     | 179       | -23.1     | 201         | TINY-like protein ( <i>P. trichocarpa</i> )                              |
| miR1919     | nta-miR1919                 | TC123361    | 1811             | 169       | -22.9     | 169       | -22.9     | 1353        | Glucose-1-phosphate adenylyltransferase ( <i>N. tabacum</i> )            |
| miR319      | nta-miR319a/b               | TC150601    | 966              | 175       | -36.1     | 175       | -36.1     | 367         | SITCP3 ( <i>S. lycopersicum</i> )                                        |
| miR390      | nta-miR390a                 | TC157664    | 1610             | 318       | -47.0     | 161       | -24.8     | 1315 1170   | CC-NBS-LRR protein ( <i>S. tuberosum</i> )                               |
|             | nta-miR390b/c               | TC157664    | 1610             | 318       | -47.0     | 161       | -24.8     | 1315 1170   | CC-NBS-LRR protein ( <i>S. tuberosum</i> )                               |
|             |                             | TC122853    | 3924             | 308       | -41.2     | 154       | -20.6     | 3835 3847   | DNA-directed RNA polymerase 1B ( <i>N. tabacum</i> )                     |
| miR394      | nta-miR394                  | TC122940    | 1316             | 170       | -23.0     | 170       | -23.0     | 584         | Nitrilase ( <i>N. tabacum</i> )                                          |
|             |                             | TC141337    | 906              | 170       | -23.0     | 170       | -23.0     | 712         |                                                                          |
|             |                             | EB433013    | 680              | 170       | -23.0     | 170       | -23.0     | 318         |                                                                          |
|             |                             | FS429526    | 527              | 170       | -23.0     | 170       | -23.0     | 406         |                                                                          |
| miR395      | nta-miR395a/b/c             | FS411240    | 618              | 325       | -42.4     | 164       | -21.6     | 100 571     | Xanthine/uracil permease family protein ( <i>S. lycopersicum</i> )       |
| miR396      | nta-miR396a/b/c             | TC131399    | 5645             | 317       | -44.0     | 162       | -22.0     | 3777 5210   | Growth-regulating factors ( <i>N. tabacum</i> )                          |
|             |                             | AM814093    | 509              | 161       | -20.0     | 161       | -20.0     | 266         |                                                                          |
|             |                             | TC144468    | 739              | 155       | -22.0     | 155       | -22.0     | 306         |                                                                          |
| miR397      | nta-miR397                  | TC137837    | 1984             | 190       | -34.2     | 190       | -34.2     | 746         | Laccase/Diphenol oxidase ( <i>N. tabacum</i> )                           |
| miR398      | nta-miR398                  | TC146710    | 541              | 162       | -21.3     | 162       | -21.3     | 148         | Metallothionein-like protein type 2 ( <i>N. tabacum</i> )                |
|             |                             | TC153262    | 1013             | 162       | -21.3     | 162       | -21.3     | 620         |                                                                          |
|             |                             | TC168311    | 808              | 162       | -21.3     | 162       | -21.3     | 127         |                                                                          |
|             |                             | CV020687    | 348              | 162       | -21.3     | 162       | -21.3     | 127         |                                                                          |
|             |                             | EB449403    | 715              | 162       | -21.3     | 162       | -21.3     | 576         |                                                                          |
|             |                             | EB448414    | 787              | 162       | -21.3     | 162       | -21.3     | 247         |                                                                          |
| miR399      | nta-miR399a/b/c/d/e/f/g     | AM828792    | 400              | 183       | -33.3     | 183       | -33.3     | 112         | Inorganic phosphate transporter 1-7/AtPht1;7 ( <i>A. thaliana</i> )      |
|             |                             | AM816750    | 571              | 183       | -33.3     | 183       | -33.3     | 315         |                                                                          |
| miR408      | nta-miR408                  | TC122858    | 2265             | 299       | -44.0     | 154       | -24.0     | 2000 1228   | Heat shock protein ( <i>N. tabacum</i> )                                 |
|             |                             | TC141347    | 2408             | 164       | -25.7     | 164       | -25.7     | 2141        |                                                                          |
|             |                             | TC135872    | 842              | 154       | -24.0     | 154       | -24.0     | 697         |                                                                          |
|             |                             | H0059626    | 626              | 146       | -22.5     | 146       | -22.5     | 457         |                                                                          |
|             |                             | HS085296    | 664              | 146       | -22.5     | 146       | -22.5     | 584         |                                                                          |
|             |                             | TC125195    | 931              | 145       | -20.0     | 145       | -20.0     | 643         |                                                                          |
|             |                             | TC126000    | 904              | 145       | -20.0     | 145       | -20.0     | 350         |                                                                          |
|             |                             | FG133364    | 799              | 145       | -20.0     | 145       | -20.0     | 484         |                                                                          |
|             |                             | FG137124    | 736              | 145       | -20.0     | 145       | -20.0     | 410         |                                                                          |
| miR477      | nta-miR477a/b               | TC140202    | 835              | 335       | -54.4     | 173       | -29.4     | 474 567     | Sucrose-6-phosphate synthase A ( <i>N. tabacum</i> )                     |
|             |                             | TC141556    | 3776             | 335       | -54.4     | 173       | -29.4     | 513 606     |                                                                          |
| miR479      | nta-miR479a                 | AM835468    | 568              | 176       | -20.5     | 176       | -20.5     | 416         | Gibberellin 2-oxidase 3 ( <i>N. tabacum</i> )                            |
|             |                             | TC139727    | 1344             | 176       | -24.1     | 176       | -24.1     | 357         | Per1-like family protein ( <i>S. tuberosum</i> )                         |
|             |                             | FS429339    | 529              | 176       | -24.1     | 176       | -24.1     | 446         |                                                                          |
|             | nta-miR479b                 | TC139727    | 1344             | 168       | -21.3     | 168       | -21.3     | 357         | Per1-like family protein ( <i>S. tuberosum</i> )                         |
|             |                             | FS429339    | 529              | 168       | -21.3     | 168       | -21.3     | 446         |                                                                          |
| miR482      | nta-miR482a/c               | TC125874    | 1271             | 177       | -29.5     | 177       | -29.5     | 349         | Glucose-6-phosphate isomerase ( <i>S. lycopersicum</i> )                 |
|             |                             | TC131822    | 873              | 177       | -29.5     | 177       | -29.5     | 451         |                                                                          |
|             | nta-miR482b-3p              | TC123107    | 1662             | 176       | -22.8     | 176       | -22.8     | 1466        | Glucosyltransferase ( <i>N. tabacum</i> )                                |
|             |                             | TC158882    | 533              | 176       | -22.8     | 176       | -22.8     | 213         |                                                                          |
|             | nta-miR482b-5p              | TC127715    | 959              | 312       | -49.0     | 159       | -25.5     | 242 286     | Proline-rich protein ( <i>S. lycopersicum</i> )                          |
|             | nta-miR482d                 | TC168260    | 622              | 172       | -25.3     | 172       | -25.3     | 179         | Cyclic nucleotide-gated calmodulin-binding ion channel ( <i>N. tab</i> ) |
| miR5303     | nta-miR5303a/b              | BP133050    | 548              | 167       | -22.2     | 167       | -22.2     | 350         | Cytosolic ascorbate peroxidase ( <i>N. tabacum</i> )                     |
|             | nta-miR5303c                | TC159100    | 526              | 445       | -68.4     | 155       | -24.1     | 342 190 160 | TA20 protein ( <i>N. tabacum</i> )                                       |
| miR6019     | nta-miR6019a/b              | FS424154    | 570              | 196       | -35.8     | 196       | -35.8     | 179         | Avr9/Cf-9 rapidly elicited protein 4 ( <i>N. tabacum</i> )               |
| miR6020     | nta-miR6020a-3p             | TC126565    | 881              | 178       | -24.3     | 178       | -24.3     | 160         | Steroid membrane binding protein-like ( <i>O. sativa</i> )               |
|             | nta-miR6020a-5p             | TC142703    | 2834             | 191       | -30.6     | 191       | -30.6     | 175         | Avr9/Cf-9 rapidly elicited protein 4 ( <i>N. tabacum</i> )               |
|             |                             | FS424154    | 570              | 191       | -30.6     | 191       | -30.6     | 166         |                                                                          |
|             | nta-miR6020b                | TC138322    | 931              | 162       | -20.0     | 162       | -20.0     | 271         | Transformer-SR ribonucleoprotein ( <i>N. tabacum</i> )                   |
|             |                             | TC140062    | 946              | 162       | -20.0     | 162       | -20.0     | 236         |                                                                          |
|             |                             | CV017868    | 539              | 162       | -20.0     | 162       | -20.0     | 361         |                                                                          |
| miR6021     | nta-miR6021                 | FG137159    | 880              | 324       | -42.2     | 166       | -22.1     | 372 292     | Copper PIB-ATPase ( <i>Glycine max</i> )                                 |
| miR6024     | nta-miR6024                 | TC124430    | 885              | 175       | -27.9     | 175       | -27.9     | 262         | Serine acetyltransferase ( <i>N. plumbaginifolia</i> )                   |
|             |                             | TC126011    | 979              | 175       | -27.9     | 175       | -27.9     | 235         |                                                                          |
|             |                             | TC126255    | 1396             | 175       | -27.9     | 175       | -27.9     | 164         |                                                                          |
| miR6025     | nta-miR6025a                | TC135300    | 853              | 179       | -22.6     | 179       | -22.6     | 806         | Ubiquitin carrier protein ( <i>N. tabacum</i> )                          |
|             | nta-miR6025b                | TC124063    | 2581             | 180       | -22.2     | 180       | -22.2     | 2533        | NTH23 protein ( <i>N. tabacum</i> )                                      |
|             | nta-miR6025c                | TC123965    | 1959             | 174       | -22.4     | 174       | -22.4     | 550         | Vacuolar H <sup>+</sup> -ATPase B subunit ( <i>N. tabacum</i> )          |
|             |                             | TC140906    | 1468             | 174       | -22.4     | 174       | -22.4     | 519         |                                                                          |
|             |                             | TC164662    | 1447             | 174       | -22.4     | 174       | -22.4     | 562         |                                                                          |
|             |                             | TC156686    | 667              | 170       | -23.8     | 170       | -23.8     | 610         |                                                                          |
|             | nta-miR6025d                | TC141163    | 1137             | 192       | -27.4     | 192       | -27.4     | 710         | NBS-LRR type resistance protein ( <i>O. sativa</i> )                     |
|             | nta-miR6025e                | TC123463    | 2585             | 174       | -23.3     | 174       | -23.3     | 2392        | N-ethylmaleimide sensitive fusion protein ( <i>N. tabacum</i> )          |
| miR6144     | nta-miR6144                 | TC134426    | 677              | 181       | -29.5     | 181       | -29.5     | 252         | Histone H3.2 ( <i>A. thaliana</i> )                                      |
| miR6145     | nta-miR6145a                | TC129271    | 1002             | 183       | -23.8     | 183       | -23.8     | 170         | RNA Binding Protein 45 ( <i>N. plumbaginifolia</i> )                     |
|             | nta-miR6145b                | TC137902    | 913              | 167       | -22.0     | 167       | -22.0     | 368         | DnaJ-like protein isoform ( <i>S. phureja</i> )                          |
|             |                             | FG638744    | 646              | 167       | -22.0     | 167       | -22.0     | 252         |                                                                          |
|             | nta-miR6145c                | TC127308    | 1385             | 164       | -21.4     | 164       | -21.4     | 1111        | NADPH-cytochrome P450 oxidoreductase ( <i>N. tabacum</i> )               |
|             |                             | TC131140    | 1383             | 164       | -21.4     | 164       | -21.4     | 412         |                                                                          |

|         |                      |            |      |     |       |     |       |           |                                                                        |
|---------|----------------------|------------|------|-----|-------|-----|-------|-----------|------------------------------------------------------------------------|
|         |                      | TC133142   | 901  | 164 | -21.4 | 164 | -21.4 | 539       |                                                                        |
|         | nta-miR6145d         | TC159048   | 737  | 175 | -23.2 | 175 | -23.2 | 408       | Basic form of pathogenesis-related protein 1 precursor ( <i>N. tab</i> |
|         | nta-miR6145e         | TC125028   | 2118 | 171 | -22.2 | 171 | -22.2 | 1496      | Ferrochelatase ( <i>N. tabacum</i> )                                   |
|         |                      | TC140088   | 970  | 171 | -22.2 | 171 | -22.2 | 203       |                                                                        |
|         |                      | FG637935   | 765  | 171 | -22.2 | 171 | -22.2 | 677       |                                                                        |
|         | nta-miR6145f         | NP13074235 | 3631 | 176 | -25.7 | 176 | -25.7 | 3147      | N-like protein ( <i>N. tabacum</i> )                                   |
| miR6146 | nta-miR6146a/b       | TC136742   | 1735 | 176 | -23.1 | 176 | -23.1 | 1524      | CYP72 ( <i>N. tabacum</i> )                                            |
|         |                      | TC148572   | 719  | 176 | -23.1 | 176 | -23.1 | 335       |                                                                        |
| miR6147 | nta-miR6147          | TC135051   | 1607 | 172 | -20.7 | 172 | -20.7 | 1205      | Glutamate dehydrogenase B ( <i>. plumbaginifolia</i> )                 |
|         |                      | TC158298   | 807  | 172 | -20.7 | 172 | -20.7 | 465       |                                                                        |
| miR6148 | nta-miR6148a         | TC142950   | 842  | 332 | -40.4 | 166 | -20.2 | 712 772   | ACC oxidase AC03 ( <i>N. attenuata</i> )                               |
|         | nta-miR6148b         | TC160770   | 564  | 179 | -20.2 | 179 | -20.2 | 40        | Chromosome chr11 scaffold_13 ( <i>V. vinifera</i> )                    |
| miR6149 | nta-miR6149a/b       | FS390832   | 362  | 165 | -22.9 | 165 | -22.9 | 319       | TCTR2 protein ( <i>S. lycopersicum</i> )                               |
| miR6150 | nta-miR6150          | TC165730   | 1028 | 179 | -21.5 | 179 | -21.5 | 868       | Retrotransposon gag protein ( <i>S. demissum</i> )                     |
| miR6151 | nta-miR6151a/b/c/d/e | TC123188   | 947  | 180 | -24.0 | 180 | -24.0 | 560       | Catalase isozyme 1 ( <i>N. tabacum</i> )                               |
|         |                      | TC124634   | 908  | 180 | -24.0 | 180 | -24.0 | 490       |                                                                        |
|         |                      | TC124875   | 865  | 180 | -24.0 | 180 | -24.0 | 421       |                                                                        |
|         |                      | TC162875   | 1935 | 180 | -24.0 | 180 | -24.0 | 545       |                                                                        |
|         |                      | TC164343   | 872  | 180 | -24.0 | 180 | -24.0 | 719       |                                                                        |
|         |                      | FG137433   | 750  | 180 | -24.0 | 180 | -24.0 | 490       |                                                                        |
|         |                      | FG182176   | 699  | 180 | -24.0 | 180 | -24.0 | 434       |                                                                        |
|         |                      | EH664871   | 817  | 170 | -22.2 | 170 | -22.2 | 505       |                                                                        |
|         | nta-miR6151f/g/h/i   | TC140583   | 632  | 324 | -42.7 | 167 | -21.7 | 22 6      | Glucose-1-phosphate adenylyltransferase ( <i>N. tabacum</i> )          |
|         |                      | TC123361   | 1811 | 167 | -21.0 | 167 | -21.0 | 11        |                                                                        |
|         |                      | TC131218   | 818  | 167 | -21.0 | 167 | -21.0 | 19        |                                                                        |
|         |                      | TC129146   | 851  | 155 | -20.9 | 155 | -20.9 | 9         |                                                                        |
| miR6152 | nta-miR6152a/b       | TC133226   | 843  | 173 | -21.3 | 173 | -21.3 | 737       | ATPase ( <i>S. tuberosum</i> )                                         |
|         |                      | TC147728   | 1595 | 173 | -21.3 | 173 | -21.3 | 645       |                                                                        |
| miR6153 | nta-miR6153          | TC141178   | 776  | 179 | -25.5 | 179 | -25.5 | 255       | Uncharacterized protein At3g24200.2 ( <i>A. thaliana</i> )             |
| miR6154 | nta-miR6154a/b       | TC169226   | 1345 | 303 | -44.0 | 155 | -23.8 | 1213 493  | Beta-D-glucan exohydrolase ( <i>N. tabacum</i> )                       |
| miR6155 | nta-miR6155          | TC155304   | 729  | 175 | -21.2 | 175 | -21.2 | 210       | Potassium channel ( <i>S. lycopersicum</i> )                           |
| miR6156 | nta-miR6156          | FS426633   | 460  | 171 | -21.7 | 171 | -21.7 | 100       | MYB transcription factor MYB145 ( <i>Glycine max</i> )                 |
|         |                      | TC128204   | 1441 | 170 | -21.6 | 170 | -21.6 | 929       |                                                                        |
| miR6157 | nta-miR6157          | TC125414   | 1369 | 171 | -22.7 | 171 | -22.7 | 708       | Jasmonic acid-amino acid-conjugating enzyme ( <i>N. attenuata</i> )    |
| miR6158 | nta-miR6158a/b/c     | TC122996   | 1922 | 170 | -23.3 | 170 | -23.3 | 331       | Biotin carboxylase ( <i>N. tabacum</i> )                               |
|         |                      | FG150962   | 814  | 170 | -23.3 | 170 | -23.3 | 100       |                                                                        |
| miR6159 | nta-miR6159          | TC156785   | 455  | 306 | -43.3 | 155 | -21.7 | 380 194   | Glycine-rich protein TomR2 ( <i>S. lycopersicum</i> )                  |
| miR6160 | nta-miR6160          | TC122853   | 3924 | 346 | -47.4 | 177 | -24.1 | 3776 1477 | DNA-directed RNA polymerase 1B, mitochondrial precursor ( <i>N. ta</i> |
| miR6161 | nta-miR6161a/b       | TC124261   | 3019 | 325 | -52.5 | 163 | -26.6 | 1349 1418 | ALG2-interacting protein X ( <i>N. tabacum</i> )                       |
|         | nta-miR6161c         | TC145376   | 701  | 194 | -34.2 | 194 | -34.2 | 667       | Avr9/Cf-9 rapidly elicited protein 76 ( <i>N. tabacum</i> )            |
|         | nta-miR6161d         | TC130660   | 873  | 173 | -21.3 | 173 | -21.3 | 576       | 4-diphosphocytidyl-2-C-methyl-D-erythritol kinase ( <i>N. benthami</i> |
|         |                      | TC142702   | 667  | 173 | -21.3 | 173 | -21.3 | 136       |                                                                        |
|         |                      | TC167586   | 1556 | 173 | -21.3 | 173 | -21.3 | 809       |                                                                        |
| miR6162 | nta-miR6162          | TC124645   | 2473 | 164 | -20.1 | 164 | -20.1 | 233       | Hydroxy-methylglutaryl-coenzyme A reductase ( <i>N. tabacum</i> )      |
|         |                      | TC129085   | 875  | 164 | -20.1 | 164 | -20.1 | 233       |                                                                        |
|         |                      | EH666128   | 1010 | 164 | -20.1 | 164 | -20.1 | 248       |                                                                        |
| miR6163 | nta-miR6163          | TC130879   | 989  | 326 | -44.8 | 166 | -23.0 | 214 237   | DC1.2-like ( <i>C. annuum</i> )                                        |
| miR6164 | nta-miR6164a/b       | AM838512   | 243  | 187 | -32.0 | 187 | -32.0 | 202       | Retrotransposon Ttol DNA ( <i>N. tabacum</i> )                         |
| miR827  | nta-miR827           | TC128315   | 932  | 170 | -21.4 | 170 | -21.4 | 337       | CCAAT-binding transcription factor subunit B ( <i>N. tabacum</i> )     |
|         |                      | TC140030   | 883  | 170 | -21.4 | 170 | -21.4 | 340       |                                                                        |
|         |                      | TC143413   | 1544 | 170 | -21.4 | 170 | -21.4 | 185       |                                                                        |



**Table S6** Targets prediction of novel miRNAs.

| miRNA name  | Target gen | Gene length (n) | Tot score | Tot energy | Max score | Max energ | Positions               | Description                                                                  |
|-------------|------------|-----------------|-----------|------------|-----------|-----------|-------------------------|------------------------------------------------------------------------------|
| novel-miR1  | TC156152   | 573             | 170       | -25.7      | 170       | -25.7     | 224                     | CC-NBS-LRR protein ( <i>S. tuberosum</i> )                                   |
|             | TC156159   | 517             | 170       | -25.7      | 170       | -25.7     | 197                     |                                                                              |
|             | AM844322   | 415             | 170       | -23.47     | 170       | -23.47    | 15                      |                                                                              |
| novel-miR2  | TC166323   | 860             | 166       | -25.84     | 166       | -25.84    | 175                     | Guanine nucleotide-binding protein subunit beta-2 ( <i>N. tabacum</i> )      |
|             | FS375002   | 510             | 162       | -20.23     | 162       | -20.23    | 189                     |                                                                              |
|             | TC141351   | 914             | 170       | -24.08     | 170       | -24.08    | 340                     |                                                                              |
|             | TC144685   | 849             | 170       | -24.08     | 170       | -24.08    | 179                     |                                                                              |
| novel-miR3  | TC147733   | 570             | 170       | -24.08     | 170       | -24.08    | 413                     | EBP6 ( <i>N. tabacum</i> )                                                   |
|             | TC126710   | 953             | 179       | -27.14     | 179       | -27.14    | 835                     |                                                                              |
| novel-miR4  | TC123427   | 2304            | 476       | -63.19     | 162       | -21.63    | 426 326 401             | EIL5 ( <i>Nicotiana tabacum</i> )                                            |
|             | FG137480   | 792             | 476       | -63.19     | 162       | -21.63    | 474 374 449             |                                                                              |
|             | TC126725   | 954             | 321       | -41.22     | 162       | -20.92    | 495 392                 |                                                                              |
| novel-miR5  | FG163120   | 712             | 321       | -41.22     | 162       | -20.92    | 211 108                 | G6PD ( <i>N. tabacum</i> )                                                   |
|             | TC127378   | 1890            | 173       | -21.12     | 173       | -21.12    | 59                      |                                                                              |
| novel-miR6  | TC133182   | 1560            | 348       | -62.41     | 190       | -36.63    | 937 881                 | Transport inhibitor response 1 ( <i>G. hirsutum</i> )                        |
|             | TC148720   | 802             | 348       | -62.41     | 190       | -36.63    | 207 151                 |                                                                              |
| novel-miR7  | TC122895   | 1673            | 179       | -25.14     | 179       | -25.14    | 330                     | CYP ( <i>N. tabacum</i> )                                                    |
|             | TC125350   | 1610            | 179       | -25.14     | 179       | -25.14    | 311                     |                                                                              |
| novel-miR8  | FG640560   | 758             | 179       | -25.14     | 179       | -25.14    | 337                     | Villin 2 ( <i>N. tabacum</i> )                                               |
|             | TC123057   | 1992            | 171       | -20.48     | 171       | -20.48    | 780                     |                                                                              |
| novel-miR9  | TC131622   | 1731            | 171       | -20.48     | 171       | -20.48    | 847                     | DEAD-box ATP-dependent RNA helicase 37 ( <i>O. sativa</i> )                  |
|             | AM810590   | 480             | 187       | -29.22     | 187       | -29.22    | 151                     |                                                                              |
| novel-miR10 | TC124312   | 1054            | 319       | -42.56     | 162       | -22.23    | 347 314                 | ASR4 ( <i>S. lycopersicum</i> )                                              |
|             | TC146505   | 708             | 319       | -42.56     | 162       | -22.23    | 364 331                 |                                                                              |
|             | EB428262   | 798             | 319       | -42.56     | 162       | -22.23    | 365 332                 |                                                                              |
| novel-miR11 | TC127090   | 1081            | 793       | -114.23    | 162       | -25.08    | 407 440 374 308 341     | DS2 protein ( <i>S. tuberosum</i> )                                          |
|             | FS433531   | 603             | 793       | -114.23    | 162       | -25.08    | 462 495 429 363 396     |                                                                              |
|             | TC125178   | 935             | 793       | -114.23    | 162       | -25.08    | 133 166 100 34 67       |                                                                              |
|             | FG185054   | 658             | 170       | -22.16     | 170       | -22.16    | 291                     |                                                                              |
| novel-miR12 | TC134073   | 1281            | 960       | -127.53    | 163       | -22.56    | 345 567 291 428 650 734 | Extensin ( <i>N. tabacum</i> )                                               |
|             | TC145834   | 1142            | 641       | -84.38     | 163       | -22.56    | 581 389 527 304         |                                                                              |
| novel-miR13 | TC169113   | 957             | 478       | -61.82     | 160       | -20.61    | 389 527 304             | SGT1 ( <i>N. benthamiana</i> )                                               |
|             | DW002761   | 735             | 323       | -43.17     | 163       | -22.56    | 275 221                 |                                                                              |
|             | TC124856   | 980             | 170       | -20.64     | 170       | -20.64    | 415                     |                                                                              |
| novel-miR14 | TC161731   | 888             | 170       | -20.64     | 170       | -20.64    | 416                     | CDC5-like protein ( <i>S. lycopersicum</i> )                                 |
|             | FG142982   | 895             | 170       | -20.64     | 170       | -20.64    | 278                     |                                                                              |
|             | TC130797   | 1348            | 867       | -125.16    | 175       | -25.58    | 893 992 1091 1190 1288  |                                                                              |
| novel-miR15 | TC130688   | 1138            | 521       | -74.18     | 175       | -25.58    | 275 473 572             | F28C11.9 ( <i>A. thaliana</i> )                                              |
|             | HS085450   | 681             | 338       | -43.9      | 173       | -22.74    | 135 97                  |                                                                              |
| novel-miR16 | TC127696   | 1134            | 167       | -25.04     | 167       | -25.04    | 723                     | Phi-1 protein ( <i>N. tabacum</i> )                                          |
|             | TC141992   | 660             | 175       | -21.38     | 175       | -21.38    | 73                      |                                                                              |
| novel-miR17 | FS430341   | 624             | 175       | -21.38     | 175       | -21.38    | 19                      | Actin-related protein 3 ( <i>N. tabacum</i> )                                |
|             | TC126568   | 990             | 165       | -22.35     | 165       | -22.35    | 623                     |                                                                              |
| novel-miR18 | TC151478   | 878             | 165       | -22.35     | 165       | -22.35    | 668                     | IAA9 protein ( <i>N. tabacum</i> )                                           |
|             | TC126513   | 1278            | 172       | -21.11     | 172       | -21.11    | 519                     |                                                                              |
| novel-miR19 | TC134252   | 805             | 172       | -21.11     | 172       | -21.11    | 607                     | S-adenosyl-methionine-sterol-C-methyltransferase homolog ( <i>N. tabac</i> ) |
|             | FG155555   | 734             | 184       | -24.49     | 184       | -24.49    | 440                     |                                                                              |
|             | FG195049   | 576             | 176       | -24.33     | 176       | -24.33    | 356                     |                                                                              |
| novel-miR20 | FG191056   | 709             | 300       | -48.06     | 150       | -24.03    | 34 142                  | Serine/threonine protein phosphatase ( <i>S. lycopersicum</i> )              |
|             | AM815929   | 525             | 174       | -20.62     | 174       | -20.62    | 372                     |                                                                              |
| novel-miR21 | FG193928   | 555             | 174       | -20.62     | 174       | -20.62    | 351                     | PttA ( <i>Petunia x hybrida</i> )                                            |
|             | TC123450   | 916             | 159       | -20.43     | 159       | -20.43    | 422                     |                                                                              |
|             | TC123811   | 924             | 159       | -20.43     | 159       | -20.43    | 505                     |                                                                              |
| novel-miR22 | TC124472   | 1776            | 159       | -20.43     | 159       | -20.43    | 496                     | WRKY transcription factor NtEIG-D48 ( <i>N. tabacum</i> )                    |
|             | FG141704   | 883             | 159       | -20.43     | 159       | -20.43    | 415                     |                                                                              |
|             | TC128664   | 941             | 160       | -26.54     | 160       | -26.54    | 476                     |                                                                              |
|             | TC147271   | 538             | 160       | -26.54     | 160       | -26.54    | 487                     |                                                                              |
| novel-miR23 | TC148676   | 2495            | 160       | -26.54     | 160       | -26.54    | 545                     | Ethylene receptor ERS homolog ( <i>N. tabacum</i> )                          |
|             | FS427700   | 507             | 160       | -26.54     | 160       | -26.54    | 326                     |                                                                              |
|             | FS406072   | 613             | 160       | -26.54     | 160       | -26.54    | 460                     |                                                                              |
| novel-miR24 | FG162393   | 880             | 169       | -21.63     | 169       | -21.63    | 321                     | EIL1 ( <i>Petunia x hybrida</i> )                                            |
|             | FG170485   | 857             | 169       | -21.63     | 169       | -21.63    | 292                     |                                                                              |
| novel-miR25 | TC131218   | 818             | 321       | -44.87     | 163       | -23.56    | 19 1                    | Glucose-1-phosphate adenylyltransferase ( <i>N. tabacum</i> )                |
|             | TC140583   | 632             | 316       | -41.8      | 163       | -21.31    | 22 6                    |                                                                              |
|             | TC123361   | 1811            | 163       | -21.31     | 163       | -21.31    | 11                      |                                                                              |
| novel-miR26 | TC129146   | 851             | 155       | -21.71     | 155       | -21.71    | 9                       | Cytochromes P450 ( <i>N. tabacum</i> )                                       |
|             | TC124278   | 1782            | 175       | -28.43     | 175       | -28.43    | 1122                    |                                                                              |
|             | TC122897   | 1727            | 162       | -24.35     | 162       | -24.35    | 1350                    |                                                                              |
|             | FG165245   | 882             | 153       | -20.96     | 153       | -20.96    | 443                     |                                                                              |
| novel-miR27 | TC122880   | 1806            | 151       | -26.13     | 151       | -26.13    | 1417                    | Eukaryotic initiation factor ( <i>N. tabacum</i> )                           |
|             | TC130596   | 1656            | 149       | -20.91     | 149       | -20.91    | 1397                    |                                                                              |
|             | TC160946   | 400             | 148       | -23.23     | 148       | -23.23    | 39                      |                                                                              |
| novel-miR28 | TC147905   | 2172            | 339       | -45.52     | 172       | -23.86    | 1455 1497               | Extensin 1 ( <i>N. tabacum</i> )                                             |
|             | TC123392   | 1631            | 174       | -28.93     | 174       | -28.93    | 642                     |                                                                              |
| novel-miR29 | TC124140   | 908             | 174       | -28.93     | 174       | -28.93    | 648                     | Eukaryotic initiation factor ( <i>N. tabacum</i> )                           |
|             | EB440487   | 825             | 174       | -28.93     | 174       | -28.93    | 665                     |                                                                              |
|             | FG190354   | 703             | 174       | -28.93     | 174       | -28.93    | 560                     |                                                                              |
| novel-miR30 | TC122931   | 1497            | 170       | -25.89     | 170       | -25.89    | 562                     | Vacuolar ATP synthase 16 kDa proteolipid subunit ( <i>N. tabacum</i> )       |
|             | TC159027   | 844             | 328       | -45.48     | 166       | -25.27    | 804 460                 |                                                                              |
|             | TC124894   | 943             | 167       | -22.36     | 167       | -22.36    | 392                     |                                                                              |
|             | TC127633   | 955             | 167       | -22.36     | 167       | -22.36    | 406                     |                                                                              |
|             | TC123167   | 927             | 162       | -20.21     | 162       | -20.21    | 376                     |                                                                              |
|             | TC127603   | 938             | 162       | -20.21     | 162       | -20.21    | 365                     |                                                                              |
|             | TC138401   | 918             | 162       | -20.21     | 162       | -20.21    | 452                     |                                                                              |
|             | TC167606   | 877             | 162       | -20.21     | 162       | -20.21    | 308                     |                                                                              |
| FG633653    | 538        | 162             | -20.21    | 162        | -20.21    | 269       |                         |                                                                              |
| FS406852    | 629        | 162             | -20.21    | 162        | -20.21    | 354       |                         |                                                                              |

**Table S7** Primers designed for stem-loop qRT-PCR analysis of miRNAs.

| <b>miRNA name</b> | <b>Primers</b>                                                                                                                                   |
|-------------------|--------------------------------------------------------------------------------------------------------------------------------------------------|
| nta-miR156g       | RT primer: GTCGTATCCAGTGCAGGGTCCGAGGTATTCGCACTGGATACGACAGGGAG<br>Forward primer: GCGGCGGTTGGACTGAAGGGAG<br>Reverse primer: CCAGTGCAGGGTCCGAGGTA  |
| nta-miR164a       | RT primer: GTCGTATCCAGTGCAGGGTCCGAGGTATTCGCACTGGATACGACTGCACG<br>Forward primer: GCGGCGGTGGAGAAGCAGGGCAC<br>Reverse primer: CCAGTGCAGGGTCCGAGGTA |
| nta-miR6149a      | RT primer: GTCGTATCCAGTGCAGGGTCCGAGGTATTCGCACTGGATACGACGCCGAT<br>Forward primer: GCGGCGGTTGATACGCACCTG<br>Reverse primer: CCAGTGCAGGGTCCGAGGTA   |
| nta-miR166a       | RT primer: GTCGTATCCAGTGCAGGGTCCGAGGTATTCGCACTGGATACGACGGGGAA<br>Forward primer: GCGGCGGTCCGACCAGGCTTC<br>Reverse primer: CCAGTGCAGGGTCCGAGGTA   |
| nta-miR169a       | RT primer: GTCGTATCCAGTGCAGGGTCCGAGGTATTCGCACTGGATACGACGAGTTC<br>Forward primer: GCGGCGGCTGAAGTGTGGGG<br>Reverse primer: CCAGTGCAGGGTCCGAGGTA    |
| novel-miR24       | RT primer: GTCGTATCCAGTGCAGGGTCCGAGGTATTCGCACTGGATACGACGTGCTC<br>Forward primer: GCGGCGGTCCAGCGGCTGGAAG<br>Reverse primer: CCAGTGCAGGGTCCGAGGTA  |
| 5.8S rRNA         | Forward primer: AGCGAAATGCGATACCT<br>Reverse primer: CAACTTGCGTTCAAAGAC                                                                          |
